# Supplementary material for: Variable Selection Patterns Associated with Constitutive and GxE Effects for Grain Yield in a Locally Adapted Soybean Population
Source: Research Square preprint supplement (doi:10.21203/rs.3.rs-4189809/v1), 2024-04-08
Supplement: Supplementary file 1 [file 92993678144c4c1c97fae3a0.xlsx]

## Sheet: Sheet1
Publication	Sample Name	Genus/Species	Population Type	City/Region of Origin	Country of Origin	Apx Seq Depth
Fang et al 2017	PI546044	Glycine max	Improved Cultivar, Canada	Ontario	Canada	18.6025
Fang et al 2017	PI548311	Glycine max	Improved Cultivar, Canada	Ontario	Canada	22.431
Fang et al 2017	PI548573	Glycine max	Improved Cultivar, Canada	Ontario	Canada	19.951
Fang et al 2017	PI548593	Glycine max	Improved Cultivar, Canada	Ontario	Canada	22.3905
Fang et al 2017	PI548643	Glycine max	Improved Cultivar, Canada	Ontario	Canada	30.2251
Fang et al 2017	PI548644	Glycine max	Improved Cultivar, Canada	Ontario	Canada	12.92
Fang et al 2017	PI591431	Glycine max	Improved Cultivar, Canada	Ontario	Canada	20.4961
Fang et al 2017	PI591432	Glycine max	Improved Cultivar, Canada	Ontario	Canada	10.6358
Fang et al 2017	PI591433	Glycine max	Improved Cultivar, Canada	Ontario	Canada	24.9116
Fang et al 2017	PI591435	Glycine max	Improved Cultivar, Canada	Ontario	Canada	44.1831
Fang et al 2017	SRR5085867	Glycine max	Improved Cultivar, Canada	.	Canada	25.1969
Fang et al 2017	SRR5085868	Glycine max	Improved Cultivar, Canada	.	Canada	16.3428
Fang et al 2017	SRR5085869	Glycine max	Improved Cultivar, Canada	.	Canada	23.916
Fang et al 2017	SRR5085870	Glycine max	Improved Cultivar, Canada	.	Canada	11.5579
Fang et al 2017	SRR5085871	Glycine max	Improved Cultivar, Canada	.	Canada	8.15601
Torkamaneh et al 2017	SRR5085740	Glycine max	Improved Cultivar, Canada	.	Canada	15.6433
Torkamaneh et al 2017	SRR5085741	Glycine max	Improved Cultivar, Canada	.	Canada	26.6951
Torkamaneh et al 2017	SRR5085742	Glycine max	Improved Cultivar, Canada	.	Canada	10.2275
Torkamaneh et al 2017	SRR5085743	Glycine max	Improved Cultivar, Canada	.	Canada	10.6341
Torkamaneh et al 2017	SRR5085744	Glycine max	Improved Cultivar, Canada	.	Canada	18.4664
Torkamaneh et al 2017	SRR5085745	Glycine max	Improved Cultivar, Canada	.	Canada	14.9676
Torkamaneh et al 2017	SRR5085746	Glycine max	Improved Cultivar, Canada	.	Canada	24.3095
Torkamaneh et al 2017	SRR5085747	Glycine max	Improved Cultivar, Canada	.	Canada	19.329
Torkamaneh et al 2017	SRR5085748	Glycine max	Improved Cultivar, Canada	.	Canada	8.2521
Torkamaneh et al 2017	SRR5085749	Glycine max	Improved Cultivar, Canada	.	Canada	10.7866
Torkamaneh et al 2017	SRR5085750	Glycine max	Improved Cultivar, Canada	.	Canada	21.3832
Torkamaneh et al 2017	SRR5085751	Glycine max	Improved Cultivar, Canada	.	Canada	11.7527
Torkamaneh et al 2017	SRR5085752	Glycine max	Improved Cultivar, Canada	.	Canada	16.6458
Torkamaneh et al 2017	SRR5085753	Glycine max	Improved Cultivar, Canada	.	Canada	4.67011
Torkamaneh et al 2017	SRR5085754	Glycine max	Improved Cultivar, Canada	.	Canada	27.144
Torkamaneh et al 2017	SRR5085755	Glycine max	Improved Cultivar, Canada	.	Canada	11.9054
Torkamaneh et al 2017	SRR5085756	Glycine max	Improved Cultivar, Canada	.	Canada	12.3334
Torkamaneh et al 2017	SRR5085757	Glycine max	Improved Cultivar, Canada	.	Canada	22.0945
Torkamaneh et al 2017	SRR5085758	Glycine max	Improved Cultivar, Canada	.	Canada	17.855
Torkamaneh et al 2017	SRR5085759	Glycine max	Improved Cultivar, Canada	.	Canada	12.2598
Torkamaneh et al 2017	SRR5085760	Glycine max	Improved Cultivar, Canada	.	Canada	14.3187
Torkamaneh et al 2017	SRR5085761	Glycine max	Improved Cultivar, Canada	.	Canada	13.2866
Torkamaneh et al 2017	SRR5085762	Glycine max	Improved Cultivar, Canada	.	Canada	14.9316
Torkamaneh et al 2017	SRR5085763	Glycine max	Improved Cultivar, Canada	.	Canada	10.806
Torkamaneh et al 2017	SRR5085764	Glycine max	Improved Cultivar, Canada	.	Canada	9.00538
Torkamaneh et al 2017	SRR5085765	Glycine max	Improved Cultivar, Canada	.	Canada	5.58625
Torkamaneh et al 2017	SRR5085766	Glycine max	Improved Cultivar, Canada	.	Canada	3.88599
Torkamaneh et al 2017	SRR5085767	Glycine max	Improved Cultivar, Canada	.	Canada	5.09134
Torkamaneh et al 2017	SRR5085768	Glycine max	Improved Cultivar, Canada	.	Canada	12.6883
Torkamaneh et al 2017	SRR5085769	Glycine max	Improved Cultivar, Canada	.	Canada	12.3804
Torkamaneh et al 2017	SRR5085770	Glycine max	Improved Cultivar, Canada	.	Canada	10.6781
Torkamaneh et al 2017	SRR5085771	Glycine max	Improved Cultivar, Canada	.	Canada	18.6669
Torkamaneh et al 2017	SRR5085772	Glycine max	Improved Cultivar, Canada	.	Canada	11.7181
Torkamaneh et al 2017	SRR5085773	Glycine max	Improved Cultivar, Canada	.	Canada	12.6579
Torkamaneh et al 2017	SRR5085774	Glycine max	Improved Cultivar, Canada	.	Canada	39.5595
Torkamaneh et al 2017	SRR5085775	Glycine max	Improved Cultivar, Canada	.	Canada	14.7906
Torkamaneh et al 2017	SRR5085776	Glycine max	Improved Cultivar, Canada	.	Canada	18.5176
Torkamaneh et al 2017	SRR5085777	Glycine max	Improved Cultivar, Canada	.	Canada	12.1648
Torkamaneh et al 2017	SRR5085778	Glycine max	Improved Cultivar, Canada	.	Canada	15.3884
Torkamaneh et al 2017	SRR5085779	Glycine max	Improved Cultivar, Canada	.	Canada	7.7875
Torkamaneh et al 2017	SRR5085780	Glycine max	Improved Cultivar, Canada	.	Canada	30.3381
Torkamaneh et al 2017	SRR5085781	Glycine max	Improved Cultivar, Canada	.	Canada	24.5898
Torkamaneh et al 2017	SRR5085782	Glycine max	Improved Cultivar, Canada	.	Canada	10.4144
Torkamaneh et al 2017	SRR5085783	Glycine max	Improved Cultivar, Canada	.	Canada	6.07008
Torkamaneh et al 2017	SRR5085784	Glycine max	Improved Cultivar, Canada	.	Canada	35.8687
Torkamaneh et al 2017	SRR5085785	Glycine max	Improved Cultivar, Canada	.	Canada	12.2035
Torkamaneh et al 2017	SRR5085786	Glycine max	Improved Cultivar, Canada	.	Canada	11.2618
Torkamaneh et al 2017	SRR5085787	Glycine max	Improved Cultivar, Canada	.	Canada	12.0762
Torkamaneh et al 2017	SRR5085788	Glycine max	Improved Cultivar, Canada	.	Canada	8.05765
Torkamaneh et al 2017	SRR5085789	Glycine max	Improved Cultivar, Canada	.	Canada	6.17592
Torkamaneh et al 2017	SRR5085790	Glycine max	Improved Cultivar, Canada	.	Canada	12.5949
Torkamaneh et al 2017	SRR5085791	Glycine max	Improved Cultivar, Canada	.	Canada	21.5294
Torkamaneh et al 2017	SRR5085792	Glycine max	Improved Cultivar, Canada	.	Canada	12.1329
Torkamaneh et al 2017	SRR5085793	Glycine max	Improved Cultivar, Canada	.	Canada	12.2866
Torkamaneh et al 2017	SRR5085794	Glycine max	Improved Cultivar, Canada	.	Canada	12.4163
Torkamaneh et al 2017	SRR5085795	Glycine max	Improved Cultivar, Canada	.	Canada	15.471
Torkamaneh et al 2017	SRR5085796	Glycine max	Improved Cultivar, Canada	.	Canada	14.1187
Torkamaneh et al 2017	SRR5085797	Glycine max	Improved Cultivar, Canada	.	Canada	27.3952
Torkamaneh et al 2017	SRR5085798	Glycine max	Improved Cultivar, Canada	.	Canada	25.5449
Torkamaneh et al 2017	SRR5085799	Glycine max	Improved Cultivar, Canada	.	Canada	4.71461
Torkamaneh et al 2017	SRR5085800	Glycine max	Improved Cultivar, Canada	.	Canada	19.3831
Torkamaneh et al 2017	SRR5085805	Glycine max	Improved Cultivar, Canada	.	Canada	13.9505
Torkamaneh et al 2017	SRR5085809	Glycine max	Improved Cultivar, Canada	.	Canada	12.5687
Torkamaneh et al 2017	SRR5085810	Glycine max	Improved Cultivar, Canada	.	Canada	4.14866
Torkamaneh et al 2017	SRR5085811	Glycine max	Improved Cultivar, Canada	.	Canada	7.64634
Torkamaneh et al 2017	SRR5085812	Glycine max	Improved Cultivar, Canada	.	Canada	12.0498
Torkamaneh et al 2017	SRR5085820	Glycine max	Improved Cultivar, Canada	.	Canada	15.4553
Torkamaneh et al 2017	SRR5085821	Glycine max	Improved Cultivar, Canada	.	Canada	18.1659
Torkamaneh et al 2017	SRR5085822	Glycine max	Improved Cultivar, Canada	.	Canada	16.4629
Torkamaneh et al 2017	SRR5085823	Glycine max	Improved Cultivar, Canada	.	Canada	6.87862
Torkamaneh et al 2017	SRR5085824	Glycine max	Improved Cultivar, Canada	.	Canada	10.383
Torkamaneh et al 2017	SRR5085834	Glycine max	Improved Cultivar, Canada	.	Canada	16.5969
Torkamaneh et al 2017	SRR5085835	Glycine max	Improved Cultivar, Canada	.	Canada	10.9231
Torkamaneh et al 2017	SRR5085836	Glycine max	Improved Cultivar, Canada	.	Canada	8.45575
Torkamaneh et al 2017	SRR5085837	Glycine max	Improved Cultivar, Canada	.	Canada	9.4598
Torkamaneh et al 2017	SRR5085838	Glycine max	Improved Cultivar, Canada	.	Canada	13.3197
Torkamaneh et al 2017	SRR5085839	Glycine max	Improved Cultivar, Canada	.	Canada	5.04942
Torkamaneh et al 2017	SRR5085840	Glycine max	Improved Cultivar, Canada	.	Canada	12.4211
Torkamaneh et al 2017	SRR5085841	Glycine max	Improved Cultivar, Canada	.	Canada	6.17118
Torkamaneh et al 2017	SRR5085842	Glycine max	Improved Cultivar, Canada	.	Canada	11.9883
Torkamaneh et al 2017	SRR5085843	Glycine max	Improved Cultivar, Canada	.	Canada	21.8337
Torkamaneh et al 2017	SRR5085844	Glycine max	Improved Cultivar, Canada	.	Canada	10.3159
Torkamaneh et al 2017	SRR5085845	Glycine max	Improved Cultivar, Canada	.	Canada	21.9
Torkamaneh et al 2017	SRR5085846	Glycine max	Improved Cultivar, Canada	.	Canada	23.4871
Torkamaneh et al 2017	SRR5085847	Glycine max	Improved Cultivar, Canada	.	Canada	12.8468
Torkamaneh et al 2017	SRR5085848	Glycine max	Improved Cultivar, Canada	.	Canada	19.5198
Torkamaneh et al 2017	SRR5085849	Glycine max	Improved Cultivar, Canada	.	Canada	10.8838
Torkamaneh et al 2017	SRR5085850	Glycine max	Improved Cultivar, Canada	.	Canada	15.4887
Torkamaneh et al 2017	SRR5085851	Glycine max	Improved Cultivar, Canada	.	Canada	19.7822
Torkamaneh et al 2017	SRR5085852	Glycine max	Improved Cultivar, Canada	.	Canada	15.8862
Torkamaneh et al 2017	SRR5085853	Glycine max	Improved Cultivar, Canada	.	Canada	3.43561
Torkamaneh et al 2017	SRR5085854	Glycine max	Improved Cultivar, Canada	.	Canada	13.1574
Torkamaneh et al 2017	SRR5085861	Glycine max	Improved Cultivar, Canada	.	Canada	6.77098
Torkamaneh et al 2017	SRR5085863	Glycine max	Improved Cultivar, Canada	.	Canada	7.58
Torkamaneh et al 2017	SRR5085864	Glycine max	Improved Cultivar, Canada	.	Canada	8.27285
Torkamaneh et al 2017	SRR5085865	Glycine max	Improved Cultivar, Canada	.	Canada	14.8193
Torkamaneh et al 2017	SRR5085866	Glycine max	Improved Cultivar, Canada	.	Canada	15.1204
Fang et al 2017	1508-101	Glycine max	Improved Cultivar, East Asia	Heilongjiang	China	17.4179
Fang et al 2017	1508-102	Glycine max	Improved Cultivar, East Asia	Heilongjiang	China	17.1601
Fang et al 2017	AGS292	Glycine max	Improved Cultivar, East Asia	Taiwan	China	19.4875
Fang et al 2017	Ba_Hong_No.1	Glycine max	Improved Cultivar, East Asia	Hebei	China	6.43282
Fang et al 2017	Bei_Dou_No.14	Glycine max	Improved Cultivar, East Asia	Heilongjiang	China	7.43729
Fang et al 2017	Bei_Dou_No.50	Glycine max	Improved Cultivar, East Asia	Heilongjiang	China	6.6224
Fang et al 2017	Bei_Dou_No.9	Glycine max	Improved Cultivar, East Asia	Heilongjiang	China	14.4339
Fang et al 2017	Beijing-IGDB-1	Glycine max	Improved Cultivar, East Asia	Jilin	China	18.4318
Fang et al 2017	Cai_Dou_No.2	Glycine max	Improved Cultivar, East Asia	Beijing	China	9.00904
Fang et al 2017	Cang_Dou_No.10	Glycine max	Improved Cultivar, East Asia	Hebei	China	8.92658
Fang et al 2017	Cang_Dou_No.5	Glycine max	Improved Cultivar, East Asia	Hebei	China	8.64938
Fang et al 2017	Chang_Dou_No.001	Glycine max	Improved Cultivar, East Asia	Shanxi	China	9.72846
Fang et al 2017	Chang_Dou_No.003	Glycine max	Improved Cultivar, East Asia	Shanxi	China	7.88413
Fang et al 2017	Chang_Dou_No.006	Glycine max	Improved Cultivar, East Asia	Shanxi	China	7.56689
Fang et al 2017	Chang_Nong_No.13	Glycine max	Improved Cultivar, East Asia	Jilin	China	23.6377
Fang et al 2017	Chang_Nong_No.15	Glycine max	Improved Cultivar, East Asia	Jilin	China	21.9979
Fang et al 2017	Chang_Nong_No.16	Glycine max	Improved Cultivar, East Asia	Jilin	China	20.2917
Fang et al 2017	Deng_Ke_No.3_1	Glycine max	Improved Cultivar, East Asia	Innermongolia	China	9.13034
Fang et al 2017	Dong_Nong_L13	Glycine max	Improved Cultivar, East Asia	Heilongjiang	China	16.7658
Fang et al 2017	Dong_Nong_No.26	Glycine max	Improved Cultivar, East Asia	Heilongjiang	China	19.0322
Fang et al 2017	Dong_Nong_No.44	Glycine max	Improved Cultivar, East Asia	Heilongjiang	China	16.0352
Fang et al 2017	Dong_Nong_No.47	Glycine max	Improved Cultivar, East Asia	Heilongjiang	China	16.1929
Fang et al 2017	Dong_Nong_No.50	Glycine max	Improved Cultivar, East Asia	Heilongjiang	China	22.2344
Fang et al 2017	Dong_Nong_No.51	Glycine max	Improved Cultivar, East Asia	Heilongjiang	China	37.6279
Fang et al 2017	Dong_Nong_No.58	Glycine max	Improved Cultivar, East Asia	Heilongjiang	China	20.3367
Fang et al 2017	Dong_Nong_No.59	Glycine max	Improved Cultivar, East Asia	Heilongjiang	China	7.23546
Fang et al 2017	Dong_Sheng_No.1	Glycine max	Improved Cultivar, East Asia	Heilongjiang	China	10.0996
Fang et al 2017	Fan_Dou_No.5	Glycine max	Improved Cultivar, East Asia	Henan	China	7.48553
Fang et al 2017	Fen_Dou_No.16	Glycine max	Improved Cultivar, East Asia	Shanxi	China	7.98035
Fang et al 2017	Fen_Dou_No.28	Glycine max	Improved Cultivar, East Asia	Shanxi	China	9.3013
Fang et al 2017	Fen_Dou_No.56	Glycine max	Improved Cultivar, East Asia	Shanxi	China	10.1947
Fang et al 2017	Fen_Dou_No.62	Glycine max	Improved Cultivar, East Asia	Shanxi	China	8.62683
Fang et al 2017	Fen_Dou_No.63	Glycine max	Improved Cultivar, East Asia	Shanxi	China	32.2399
Fang et al 2017	Fen_Dou_No.65	Glycine max	Improved Cultivar, East Asia	Shanxi	China	25.2491
Fang et al 2017	Fen_Dou_No.78	Glycine max	Improved Cultivar, East Asia	Shanxi	China	32.5049
Fang et al 2017	Fen_Dou_No.79	Glycine max	Improved Cultivar, East Asia	Shanxi	China	28.1687
Fang et al 2017	Fen_Dou_No.85	Glycine max	Improved Cultivar, East Asia	Shanxi	China	24.6562
Fang et al 2017	Fen_Dou_No.86	Glycine max	Improved Cultivar, East Asia	Shanxi	China	29.1822
Fang et al 2017	Fen_Dou_No.88	Glycine max	Improved Cultivar, East Asia	Shanxi	China	31.2331
Fang et al 2017	Fen_Dou_No.89	Glycine max	Improved Cultivar, East Asia	Shanxi	China	35.659
Fang et al 2017	Feng_Jiao_66-12	Glycine max	Improved Cultivar, East Asia	Liaoning	China	8.19998
Fang et al 2017	Fu_Yang_No.335	Glycine max	Improved Cultivar, East Asia	Anhui	China	20.6934
Fang et al 2017	Fu75-65	Glycine max	Improved Cultivar, East Asia	Anhui	China	7.13616
Fang et al 2017	Gao_Feng_No.1	Glycine max	Improved Cultivar, East Asia	Shandong	China	8.01473
Fang et al 2017	Gui_Chun_No.2	Glycine max	Improved Cultivar, East Asia	Guangxi	China	12.9883
Fang et al 2017	Gui_Chun_No.8	Glycine max	Improved Cultivar, East Asia	Guangxi	China	30.387
Fang et al 2017	Han_Dou_No.10	Glycine max	Improved Cultivar, East Asia	Hebei	China	10.1283
Fang et al 2017	Han_No.6192	Glycine max	Improved Cultivar, East Asia	Hebei	China	7.75608
Fang et al 2017	Harbin_91-6065	Glycine max	Improved Cultivar, East Asia	Heilongjiang	China	27.3781
Fang et al 2017	He_Dou_No.10	Glycine max	Improved Cultivar, East Asia	Shandong	China	9.3062
Fang et al 2017	He_Dou_No.13	Glycine max	Improved Cultivar, East Asia	Shandong	China	28.5208
Fang et al 2017	He_Dou_No.16	Glycine max	Improved Cultivar, East Asia	Shandong	China	6.20995
Fang et al 2017	He_Feng_No.23	Glycine max	Improved Cultivar, East Asia	Heilongjiang	China	19.7474
Fang et al 2017	He_Feng_No.25	Glycine max	Improved Cultivar, East Asia	Heilongjiang	China	17.239
Fang et al 2017	He_Feng_No.30	Glycine max	Improved Cultivar, East Asia	Heilongjiang	China	7.17182
Fang et al 2017	He_Feng_No.35	Glycine max	Improved Cultivar, East Asia	Heilongjiang	China	7.37324
Fang et al 2017	He_Feng_No.46	Glycine max	Improved Cultivar, East Asia	Heilongjiang	China	8.77966
Fang et al 2017	He_Feng_No.52	Glycine max	Improved Cultivar, East Asia	Heilongjiang	China	7.97364
Fang et al 2017	He_Nan_Zao_Feng_No.1	Glycine max	Improved Cultivar, East Asia	Henan	China	8.39778
Fang et al 2017	He_Nong_No.60	Glycine max	Improved Cultivar, East Asia	Heilongjiang	China	15.3711
Fang et al 2017	Hei_He_No.1	Glycine max	Improved Cultivar, East Asia	Heilongjiang	China	18.3934
Fang et al 2017	Hei_He_No.36	Glycine max	Improved Cultivar, East Asia	Heilongjiang	China	17.362
Fang et al 2017	Hei_He_No.4	Glycine max	Improved Cultivar, East Asia	Heilongjiang	China	17.7243
Fang et al 2017	Hei_He_No.46	Glycine max	Improved Cultivar, East Asia	Heilongjiang	China	11.3988
Fang et al 2017	Hei_He_R1	Glycine max	Improved Cultivar, East Asia	Heilongjiang	China	23.118
Fang et al 2017	Hei_Nong_No.2	Glycine max	Improved Cultivar, East Asia	Heilongjiang	China	9.28284
Fang et al 2017	Hei_Nong_No.40	Glycine max	Improved Cultivar, East Asia	Heilongjiang	China	16.8845
Fang et al 2017	Hei_Nong_No.41	Glycine max	Improved Cultivar, East Asia	Heilongjiang	China	21.1105
Fang et al 2017	Hei_Nong_No.48	Glycine max	Improved Cultivar, East Asia	Heilongjiang	China	11.2006
Fang et al 2017	Hei_Nong_No.50	Glycine max	Improved Cultivar, East Asia	Heilongjiang	China	8.60138
Fang et al 2017	Hei_Nong_No.51	Glycine max	Improved Cultivar, East Asia	Heilongjiang	China	17.7804
Fang et al 2017	Hei_Nong_No.57	Glycine max	Improved Cultivar, East Asia	Heilongjiang	China	9.08577
Fang et al 2017	Hei_Nong_No.59	Glycine max	Improved Cultivar, East Asia	Heilongjiang	China	7.44324
Fang et al 2017	Hei_Nong_No.64	Glycine max	Improved Cultivar, East Asia	Heilongjiang	China	7.79244
Fang et al 2017	Hei_Nong_No.68	Glycine max	Improved Cultivar, East Asia	Heilongjiang	China	10.2446
Fang et al 2017	Hei_Nong_No.69	Glycine max	Improved Cultivar, East Asia	Heilongjiang	China	8.59811
Fang et al 2017	Hua_Dou_No.1	Glycine max	Improved Cultivar, East Asia	Tianjin	China	8.38477
Fang et al 2017	Hua_Dou_No.2	Glycine max	Improved Cultivar, East Asia	Tianjin	China	7.35215
Fang et al 2017	Ji_Dou_No.1	Glycine max	Improved Cultivar, East Asia	Jilin	China	7.05988
Fang et al 2017	Ji_Dou_No.12	Glycine max	Improved Cultivar, East Asia	Hebei	China	8.80035
Fang et al 2017	Ji_Dou_No.15	Glycine max	Improved Cultivar, East Asia	Hebei	China	8.35461
Fang et al 2017	Ji_Dou_No.16	Glycine max	Improved Cultivar, East Asia	Hebei	China	6.72722
Fang et al 2017	Ji_Dou_No.17	Glycine max	Improved Cultivar, East Asia	Hebei	China	7.69513
Fang et al 2017	Ji_Dou_No.18	Glycine max	Improved Cultivar, East Asia	Hebei	China	8.11348
Fang et al 2017	Ji_Dou_No.19	Glycine max	Improved Cultivar, East Asia	Hebei	China	9.8808
Fang et al 2017	Ji_Dou_No.20	Glycine max	Improved Cultivar, East Asia	Hebei	China	11.0793
Fang et al 2017	Ji_Dou_No.21	Glycine max	Improved Cultivar, East Asia	Hebei	China	19.8953
Fang et al 2017	Ji_Dou_No.7	Glycine max	Improved Cultivar, East Asia	Hebei	China	7.92502
Fang et al 2017	Ji_Huang_No.13	Glycine max	Improved Cultivar, East Asia	Hebei	China	9.58411
Fang et al 2017	Ji_Ke_Dou_No.1	Glycine max	Improved Cultivar, East Asia	Jilin	China	8.1117
Fang et al 2017	Ji_Lin_No.21	Glycine max	Improved Cultivar, East Asia	Jilin	China	8.95407
Fang et al 2017	Ji_Lin_No.31	Glycine max	Improved Cultivar, East Asia	Jilin	China	7.89395
Fang et al 2017	Ji_Lin_No.35	Glycine max	Improved Cultivar, East Asia	Jilin	China	9.35339
Fang et al 2017	Ji_Lin_No.45	Glycine max	Improved Cultivar, East Asia	Jilin	China	9.35404
Fang et al 2017	Ji_NF_No.58	Glycine max	Improved Cultivar, East Asia	Hebei	China	6.963
Fang et al 2017	Ji_No.56	Glycine max	Improved Cultivar, East Asia	Jilin	China	8.12052
Fang et al 2017	Ji_Nong_No.14	Glycine max	Improved Cultivar, East Asia	Jilin	China	8.19974
Fang et al 2017	Ji_Nong_No.23	Glycine max	Improved Cultivar, East Asia	Jilin	China	8.40064
Fang et al 2017	Ji_Nong_No.9	Glycine max	Improved Cultivar, East Asia	Jilin	China	8.72398
Fang et al 2017	Ji_Qing_No.1	Glycine max	Improved Cultivar, East Asia	Jilin	China	8.12344
Fang et al 2017	Ji_Ti_No.2	Glycine max	Improved Cultivar, East Asia	Liaoning	China	9.86374
Fang et al 2017	Ji_Xiao_No.6	Glycine max	Improved Cultivar, East Asia	Jilin	China	9.6194
Fang et al 2017	Ji_Yu_No.45	Glycine max	Improved Cultivar, East Asia	Jilin	China	5.89749
Fang et al 2017	Ji_Yu_No.53	Glycine max	Improved Cultivar, East Asia	Jilin	China	8.5978
Fang et al 2017	Ji_Yu_No.63	Glycine max	Improved Cultivar, East Asia	Jilin	China	9.38883
Fang et al 2017	Ji_Yu_No.76	Glycine max	Improved Cultivar, East Asia	Jilin	China	8.33127
Fang et al 2017	Ji_Yu_No.90	Glycine max	Improved Cultivar, East Asia	Jilin	China	20.4571
Fang et al 2017	Jian_No.8	Glycine max	Improved Cultivar, East Asia	Beijing	China	10.3122
Fang et al 2017	Jian_No.9	Glycine max	Improved Cultivar, East Asia	Beijing	China	7.22158
Fang et al 2017	Jilin_21	Glycine max	Improved Cultivar, East Asia	Jilin	China	18.2301
Fang et al 2017	Jin_Da_No.26	Glycine max	Improved Cultivar, East Asia	Shanxi	China	19.1479
Fang et al 2017	Jin_Da_No.52	Glycine max	Improved Cultivar, East Asia	Shanxi	China	31.6064
Fang et al 2017	Jin_Da_No.62	Glycine max	Improved Cultivar, East Asia	Shanxi	China	16.6511
Fang et al 2017	Jin_Da_No.70	Glycine max	Improved Cultivar, East Asia	Shanxi	China	17.6678
Fang et al 2017	Jin_Da_No.73	Glycine max	Improved Cultivar, East Asia	Shanxi	China	21.1994
Fang et al 2017	Jin_Da_No.74	Glycine max	Improved Cultivar, East Asia	Shanxi	China	9.02921
Fang et al 2017	Jin_Da_No.75	Glycine max	Improved Cultivar, East Asia	Shanxi	China	18.7254
Fang et al 2017	Jin_Da_No.78-1	Glycine max	Improved Cultivar, East Asia	Shanxi	China	7.65331
Fang et al 2017	Jin_Da_No.78-2	Glycine max	Improved Cultivar, East Asia	Shanxi	China	8.08202
Fang et al 2017	Jin_Dou_No.1	Glycine max	Improved Cultivar, East Asia	Shanxi	China	20.2102
Fang et al 2017	Jin_Dou_No.10	Glycine max	Improved Cultivar, East Asia	Shanxi	China	8.11209
Fang et al 2017	Jin_Dou_No.14	Glycine max	Improved Cultivar, East Asia	Shanxi	China	9.77774
Fang et al 2017	Jin_Dou_No.16	Glycine max	Improved Cultivar, East Asia	Shanxi	China	11.119
Fang et al 2017	Jin_Dou_No.19	Glycine max	Improved Cultivar, East Asia	Shanxi	China	7.53126
Fang et al 2017	Jin_Dou_No.2	Glycine max	Improved Cultivar, East Asia	Shanxi	China	9.46932
Fang et al 2017	Jin_Dou_No.21	Glycine max	Improved Cultivar, East Asia	Shanxi	China	9.70295
Fang et al 2017	Jin_Dou_No.23	Glycine max	Improved Cultivar, East Asia	Shanxi	China	12.1862
Fang et al 2017	Jin_Dou_No.25	Glycine max	Improved Cultivar, East Asia	Shanxi	China	10.1242
Fang et al 2017	Jin_Dou_No.29	Glycine max	Improved Cultivar, East Asia	Shanxi	China	10.7231
Fang et al 2017	Jin_Dou_No.34	Glycine max	Improved Cultivar, East Asia	Shanxi	China	7.78143
Fang et al 2017	Jin_Dou_No.39	Glycine max	Improved Cultivar, East Asia	Shanxi	China	7.92412
Fang et al 2017	Jin_Dou_No.41	Glycine max	Improved Cultivar, East Asia	Shanxi	China	8.53483
Fang et al 2017	Jin_Dou_No.43	Glycine max	Improved Cultivar, East Asia	Shanxi	China	7.96135
Fang et al 2017	Jin_Dou_No.501	Glycine max	Improved Cultivar, East Asia	Shanxi	China	9.5357
Fang et al 2017	Jin_Yi_No.10	Glycine max	Improved Cultivar, East Asia	Shanxi	China	9.75993
Fang et al 2017	Jin_Yi_No.31	Glycine max	Improved Cultivar, East Asia	Shanxi	China	7.40995
Fang et al 2017	Jin_Yi_No.43	Glycine max	Improved Cultivar, East Asia	Shanxi	China	7.24696
Fang et al 2017	Jin_Yi_No.46	Glycine max	Improved Cultivar, East Asia	Shanxi	China	6.51974
Fang et al 2017	Jin_Yi_No.51	Glycine max	Improved Cultivar, East Asia	Shanxi	China	7.54869
Fang et al 2017	Jin_Yi_No.52	Glycine max	Improved Cultivar, East Asia	Shanxi	China	8.65078
Fang et al 2017	Jin_Yi_No.59	Glycine max	Improved Cultivar, East Asia	Shanxi	China	8.26843
Fang et al 2017	Jin_Yuan_No.2	Glycine max	Improved Cultivar, East Asia	Heilongjiang	China	7.84073
Fang et al 2017	Jin_Zao_No.16	Glycine max	Improved Cultivar, East Asia	Shanxi	China	6.84567
Fang et al 2017	Jing_Feng_No.1	Glycine max	Improved Cultivar, East Asia	Beijing	China	7.14855
Fang et al 2017	Jing_Huang_No.03-5	Glycine max	Improved Cultivar, East Asia	Beijing	China	9.14156
Fang et al 2017	Jing_Huang_No.3	Glycine max	Improved Cultivar, East Asia	Beijing	China	9.98139
Fang et al 2017	Jing_Xuan_No.2	Glycine max	Improved Cultivar, East Asia	Hebei	China	7.31003
Fang et al 2017	Jing_Yin_Ke_Xuan_No.1	Glycine max	Improved Cultivar, East Asia	Beijing	China	6.57543
Fang et al 2017	Jiu_Nong_No.21	Glycine max	Improved Cultivar, East Asia	Jilin	China	7.93364
Fang et al 2017	Jiu_Nong_No.27	Glycine max	Improved Cultivar, East Asia	Jilin	China	7.1786
Fang et al 2017	Jiu_Nong_No.30	Glycine max	Improved Cultivar, East Asia	Jilin	China	20.4047
Fang et al 2017	Ju_Xuan_No.23	Glycine max	Improved Cultivar, East Asia	Shandong	China	7.94324
Fang et al 2017	Kang_Xian_No.3	Glycine max	Improved Cultivar, East Asia	Heilongjiang	China	10.7899
Fang et al 2017	Ke_Bei_No.1	Glycine max	Improved Cultivar, East Asia	Heilongjiang	China	6.90248
Fang et al 2017	Ke_Dou_No.1	Glycine max	Improved Cultivar, East Asia	Beijing	China	7.26594
Fang et al 2017	Ke_Feng_No.1	Glycine max	Improved Cultivar, East Asia	Beijing	China	9.61607
Fang et al 2017	Ke_Feng_No.14	Glycine max	Improved Cultivar, East Asia	Beijing	China	9.48301
Fang et al 2017	Ke_Feng_No.15	Glycine max	Improved Cultivar, East Asia	Beijing	China	7.6855
Fang et al 2017	Ke_Feng_No.29	Glycine max	Improved Cultivar, East Asia	Beijing	China	8.97602
Fang et al 2017	Ke_Feng_No.35	Glycine max	Improved Cultivar, East Asia	Beijing	China	9.33419
Fang et al 2017	Ke_Feng_No.53	Glycine max	Improved Cultivar, East Asia	Beijing	China	10.7815
Fang et al 2017	Ke_Feng_No.6	Glycine max	Improved Cultivar, East Asia	Beijing	China	15.7982
Fang et al 2017	Ke_Huang_No.3	Glycine max	Improved Cultivar, East Asia	Beijing	China	7.15102
Fang et al 2017	Ke_Xi_No.8	Glycine max	Improved Cultivar, East Asia	Beijing	China	7.12184
Fang et al 2017	Ke_Xin_No.3	Glycine max	Improved Cultivar, East Asia	Beijing	China	7.57409
Fang et al 2017	Ke_Xin_No.4	Glycine max	Improved Cultivar, East Asia	Beijing	China	6.69863
Fang et al 2017	Ke_Xin_No.6	Glycine max	Improved Cultivar, East Asia	Beijing	China	11.5243
Fang et al 2017	Ke_Xin_No.8	Glycine max	Improved Cultivar, East Asia	Beijing	China	6.91046
Fang et al 2017	Ken_Dou_No.25	Glycine max	Improved Cultivar, East Asia	Heilongjiang	China	7.01082
Fang et al 2017	Ken_Dou_No.30	Glycine max	Improved Cultivar, East Asia	Heilongjiang	China	8.77998
Fang et al 2017	Ken_Dou_No.33	Glycine max	Improved Cultivar, East Asia	Heilongjiang	China	7.92775
Fang et al 2017	Ken_Feng_No.14	Glycine max	Improved Cultivar, East Asia	Heilongjiang	China	11.3686
Fang et al 2017	Ken_Feng_No.15	Glycine max	Improved Cultivar, East Asia	Heilongjiang	China	17.8096
Fang et al 2017	Ken_Feng_No.19	Glycine max	Improved Cultivar, East Asia	Heilongjiang	China	15.4055
Fang et al 2017	Ken_Feng_No.6	Glycine max	Improved Cultivar, East Asia	Heilongjiang	China	6.00583
Fang et al 2017	Ken_Nong_No.14	Glycine max	Improved Cultivar, East Asia	Heilongjiang	China	16.2698
Fang et al 2017	Ken_Nong_No.4	Glycine max	Improved Cultivar, East Asia	Heilongjiang	China	15.2075
Fang et al 2017	Ken_Nong_No.5	Glycine max	Improved Cultivar, East Asia	Heilongjiang	China	8.02775
Fang et al 2017	Liao_Dou_No.10	Glycine max	Improved Cultivar, East Asia	Liaoning	China	7.1077
Fang et al 2017	Liao_Dou_No.11	Glycine max	Improved Cultivar, East Asia	Liaoning	China	17.4125
Fang et al 2017	Liao_Dou_No.15	Glycine max	Improved Cultivar, East Asia	Liaoning	China	20.8254
Fang et al 2017	Liao_Dou_No.16	Glycine max	Improved Cultivar, East Asia	Liaoning	China	6.60023
Fang et al 2017	Liao_Dou_No.17	Glycine max	Improved Cultivar, East Asia	Liaoning	China	18.8924
Fang et al 2017	Liao_Dou_No.21	Glycine max	Improved Cultivar, East Asia	Liaoning	China	17.5691
Fang et al 2017	Liao_Dou_No.22	Glycine max	Improved Cultivar, East Asia	Liaoning	China	7.31092
Fang et al 2017	Liao_Dou_No.3	Glycine max	Improved Cultivar, East Asia	Liaoning	China	20.8123
Fang et al 2017	Liao_Dou_No.31	Glycine max	Improved Cultivar, East Asia	Liaoning	China	7.18054
Fang et al 2017	Lin_Dou_No.10	Glycine max	Improved Cultivar, East Asia	Shandong	China	21.2631
Fang et al 2017	Long_Hei_No.1	Glycine max	Improved Cultivar, East Asia	Heilongjiang	China	8.6462
Fang et al 2017	Long_Xiao_Li_Dou_No.1	Glycine max	Improved Cultivar, East Asia	Heilongjiang	China	8.09976
Fang et al 2017	Long_Xuan_No.1	Glycine max	Improved Cultivar, East Asia	Heilongjiang	China	10.4112
Fang et al 2017	Lu_Dou_No.11	Glycine max	Improved Cultivar, East Asia	Shandong	China	18.0625
Fang et al 2017	Lu_Dou_No.4	Glycine max	Improved Cultivar, East Asia	Shandong	China	10.527
Fang et al 2017	Meng_Dou_No.11	Glycine max	Improved Cultivar, East Asia	Innermongolia	China	7.72403
Fang et al 2017	Meng_Qing_No.3	Glycine max	Improved Cultivar, East Asia	Anhui	China	6.97489
Fang et al 2017	Mo_He_No.1	Glycine max	Improved Cultivar, East Asia	Heilongjiang	China	15.8201
Fang et al 2017	Mufeng_No.1	Glycine max	Improved Cultivar, East Asia	Heilongjiang	China	15.27
Fang et al 2017	Nan_Nong_Cai_Dou_No.1	Glycine max	Improved Cultivar, East Asia	Jiangsu	China	18.2307
Fang et al 2017	Nan_Nong_Cai_Dou_No.5	Glycine max	Improved Cultivar, East Asia	Jiangsu	China	17.8883
Fang et al 2017	Nan_Nong_Da_Huang_Dou	Glycine max	Improved Cultivar, East Asia	Jiangsu	China	13.168
Fang et al 2017	Nan_Nong_No.493-1	Glycine max	Improved Cultivar, East Asia	Jiangsu	China	7.21539
Fang et al 2017	Nen_Feng_No.11	Glycine max	Improved Cultivar, East Asia	Heilongjiang	China	7.54207
Fang et al 2017	Nen_Feng_No.16	Glycine max	Improved Cultivar, East Asia	Heilongjiang	China	6.81147
Fang et al 2017	Qi_Huang_No.25	Glycine max	Improved Cultivar, East Asia	Shandong	China	6.93301
Fang et al 2017	Qi_Huang_No.26	Glycine max	Improved Cultivar, East Asia	Shandong	China	6.35707
Fang et al 2017	Qi_Huang_No.28	Glycine max	Improved Cultivar, East Asia	Shandong	China	11.2541
Fang et al 2017	Qi_Huang_No.30	Glycine max	Improved Cultivar, East Asia	Shandong	China	7.57665
Fang et al 2017	Qi_Huang_No.31	Glycine max	Improved Cultivar, East Asia	Shandong	China	11.1109
Fang et al 2017	Qi_Huang_No.33	Glycine max	Improved Cultivar, East Asia	Shandong	China	7.05993
Fang et al 2017	Qun_Xuan_No.1	Glycine max	Improved Cultivar, East Asia	Jilin	China	7.86685
Fang et al 2017	Shan_Dou_No.125	Glycine max	Improved Cultivar, East Asia	Shaanxi	China	10.7193
Fang et al 2017	Shan_Ning_No.12	Glycine max	Improved Cultivar, East Asia	Shandong	China	25.3576
Fang et al 2017	Shan_Ning_No.7	Glycine max	Improved Cultivar, East Asia	Shandong	China	6.22742
Fang et al 2017	Shen_Li_No.3	Glycine max	Improved Cultivar, East Asia	Shandong	China	21.4608
Fang et al 2017	Sheng_Dou_No.9	Glycine max	Improved Cultivar, East Asia	Shandong	China	21.8524
Fang et al 2017	Shi_Dou_No.411	Glycine max	Improved Cultivar, East Asia	Hebei	China	7.69904
Fang et al 2017	Shu_Xian_No.205	Glycine max	Improved Cultivar, East Asia	Sichuan	China	17.7431
Fang et al 2017	Su_Nong_No.10	Glycine max	Improved Cultivar, East Asia	Heilongjiang	China	8.93527
Fang et al 2017	Su_Nong_No.14	Glycine max	Improved Cultivar, East Asia	Heilongjiang	China	20.687
Fang et al 2017	Su_Nong_No.25	Glycine max	Improved Cultivar, East Asia	Heilongjiang	China	17.2985
Fang et al 2017	Su_Nong_No.33	Glycine max	Improved Cultivar, East Asia	Heilongjiang	China	17.2142
Fang et al 2017	Sui_Ke_No.928	Glycine max	Improved Cultivar, East Asia	Anhui	China	7.48685
Fang et al 2017	Sui_Nong_No.16	Glycine max	Improved Cultivar, East Asia	Heilongjiang	China	6.762
Fang et al 2017	Sui_Nong_No.22	Glycine max	Improved Cultivar, East Asia	Heilongjiang	China	7.1833
Fang et al 2017	Sui_Nong_No.30	Glycine max	Improved Cultivar, East Asia	Heilongjiang	China	6.59556
Fang et al 2017	Sui_Wu_Xing_No.1	Glycine max	Improved Cultivar, East Asia	Heilongjiang	China	20.7152
Fang et al 2017	Sui_Xiao_Li_Dou_No.1	Glycine max	Improved Cultivar, East Asia	Heilongjiang	China	6.78289
Fang et al 2017	Tai_Nong_No.15	Glycine max	Improved Cultivar, East Asia	Taiwan	China	6.70871
Fang et al 2017	Tai_Wan_No.1	Glycine max	Improved Cultivar, East Asia	Taiwan	China	19.0779
Fang et al 2017	Tai_Wan_No.75	Glycine max	Improved Cultivar, East Asia	Taiwan	China	16.4057
Fang et al 2017	Tie_Dou_No.37	Glycine max	Improved Cultivar, East Asia	Liaoning	China	6.49672
Fang et al 2017	Tie_Dou_No.61	Glycine max	Improved Cultivar, East Asia	Liaoning	China	7.60897
Fang et al 2017	Tie_Feng_No.22	Glycine max	Improved Cultivar, East Asia	Liaoning	China	23.3598
Fang et al 2017	Tie_Feng_No.31	Glycine max	Improved Cultivar, East Asia	Liaoning	China	7.11221
Fang et al 2017	Tie_Feng_No.35	Glycine max	Improved Cultivar, East Asia	Liaoning	China	5.90278
Fang et al 2017	Wan_Dou_No.24	Glycine max	Improved Cultivar, East Asia	Anhui	China	18.8801
Fang et al 2017	Wan_Dou_No.28	Glycine max	Improved Cultivar, East Asia	Anhui	China	9.13211
Fang et al 2017	Wan_Dou_No.29	Glycine max	Improved Cultivar, East Asia	Anhui	China	6.10951
Fang et al 2017	Wan_Dou_No.30	Glycine max	Improved Cultivar, East Asia	Anhui	China	5.77219
Fang et al 2017	Wei_No.6823	Glycine max	Improved Cultivar, East Asia	Shandong	China	19.703
Fang et al 2017	Wu_Xing_No.1	Glycine max	Improved Cultivar, East Asia	Hebei	China	7.60844
Fang et al 2017	Wu_Xing_No.2	Glycine max	Improved Cultivar, East Asia	Hebei	China	8.60417
Fang et al 2017	Wu_Xing_No.3	Glycine max	Improved Cultivar, East Asia	Hebei	China	8.89025
Fang et al 2017	Xi_Zang_Da_Dou_No.20	Glycine max	Improved Cultivar, East Asia	Tibet	China	17.9151
Fang et al 2017	Xi_Zang_Da_Dou_No.3	Glycine max	Improved Cultivar, East Asia	Tibet	China	22.8597
Fang et al 2017	Xin_Da_Dou_No.8	Glycine max	Improved Cultivar, East Asia	Heilongjiang	China	9.52109
Fang et al 2017	Xu_Dou_No.10	Glycine max	Improved Cultivar, East Asia	Jiangsu	China	8.44631
Fang et al 2017	Xu_Dou_No.11	Glycine max	Improved Cultivar, East Asia	Jiangsu	China	9.00698
Fang et al 2017	Xu_Dou_No.12	Glycine max	Improved Cultivar, East Asia	Jiangsu	China	9.43157
Fang et al 2017	Xu_Dou_No.13	Glycine max	Improved Cultivar, East Asia	Jiangsu	China	9.87388
Fang et al 2017	Xu_Dou_No.14	Glycine max	Improved Cultivar, East Asia	Jiangsu	China	8.08813
Fang et al 2017	Xu_Dou_No.15	Glycine max	Improved Cultivar, East Asia	Jiangsu	China	9.34104
Fang et al 2017	Xu_Dou_No.16	Glycine max	Improved Cultivar, East Asia	Jiangsu	China	7.69993
Fang et al 2017	Xu_Dou_No.17	Glycine max	Improved Cultivar, East Asia	Jiangsu	China	8.56156
Fang et al 2017	Xu_Dou_No.9	Glycine max	Improved Cultivar, East Asia	Jiangsu	China	7.33695
Fang et al 2017	Xu_No.0705	Glycine max	Improved Cultivar, East Asia	Jiangsu	China	7.9931
Fang et al 2017	Yan_Nong_No.3	Glycine max	Improved Cultivar, East Asia	Jilin	China	8.36072
Fang et al 2017	You_Bian_No.30	Glycine max	Improved Cultivar, East Asia	Beijing	China	9.56914
Fang et al 2017	Yu_Dou_No.10	Glycine max	Improved Cultivar, East Asia	Henan	China	9.62331
Fang et al 2017	Yu_Dou_No.12	Glycine max	Improved Cultivar, East Asia	Henan	China	8.3426
Fang et al 2017	Yu_Dou_No.18	Glycine max	Improved Cultivar, East Asia	Henan	China	11.2462
Fang et al 2017	Yu_Dou_No.2	Glycine max	Improved Cultivar, East Asia	Henan	China	9.75914
Fang et al 2017	Yu_Dou_No.22	Glycine max	Improved Cultivar, East Asia	Henan	China	11.8224
Fang et al 2017	Yu_Dou_No.25	Glycine max	Improved Cultivar, East Asia	Henan	China	11.7065
Fang et al 2017	Yu_Dou_No.28	Glycine max	Improved Cultivar, East Asia	Henan	China	10.6465
Fang et al 2017	Yu_Dou_No.8	Glycine max	Improved Cultivar, East Asia	Henan	China	7.53882
Fang et al 2017	Yu_Xuan_No.13	Glycine max	Improved Cultivar, East Asia	Shanxi	China	13.0238
Fang et al 2017	Zao_Shu_No.17	Glycine max	Improved Cultivar, East Asia	Beijing	China	8.90728
Fang et al 2017	Zao_Shu_No.18	Glycine max	Improved Cultivar, East Asia	Beijing	China	7.05766
Fang et al 2017	Zheng_No.59	Glycine max	Improved Cultivar, East Asia	Henan	China	7.75546
Fang et al 2017	Zheng_No.7016	Glycine max	Improved Cultivar, East Asia	Henan	China	10.1872
Fang et al 2017	Zheng_No.92029	Glycine max	Improved Cultivar, East Asia	Henan	China	13.8063
Fang et al 2017	Zheng_No.9525	Glycine max	Improved Cultivar, East Asia	Henan	China	9.47129
Fang et al 2017	Zheng_No.97196	Glycine max	Improved Cultivar, East Asia	Henan	China	7.86989
Fang et al 2017	Zheng_No.9805	Glycine max	Improved Cultivar, East Asia	Henan	China	14.2134
Fang et al 2017	Zheng_Zhou_No.135	Glycine max	Improved Cultivar, East Asia	Henan	China	7.1232
Fang et al 2017	Zhong_Huang_No.10	Glycine max	Improved Cultivar, East Asia	Beijing	China	10.1154
Fang et al 2017	Zhong_Huang_No.13	Glycine max	Improved Cultivar, East Asia	Beijing	China	22.0143
Fang et al 2017	Zhong_Huang_No.14	Glycine max	Improved Cultivar, East Asia	Beijing	China	15.642
Fang et al 2017	Zhong_Huang_No.19	Glycine max	Improved Cultivar, East Asia	Beijing	China	11.3888
Fang et al 2017	Zhong_Huang_No.24	Glycine max	Improved Cultivar, East Asia	Beijing	China	7.63585
Fang et al 2017	Zhong_Huang_No.28	Glycine max	Improved Cultivar, East Asia	Beijing	China	8.48831
Fang et al 2017	Zhong_Huang_No.30	Glycine max	Improved Cultivar, East Asia	Beijing	China	6.15102
Fang et al 2017	Zhong_Huang_No.31	Glycine max	Improved Cultivar, East Asia	Beijing	China	24.9138
Fang et al 2017	Zhong_Huang_No.34	Glycine max	Improved Cultivar, East Asia	Beijing	China	8.31877
Fang et al 2017	Zhong_Huang_No.35	Glycine max	Improved Cultivar, East Asia	Beijing	China	9.55182
Fang et al 2017	Zhong_Huang_No.38	Glycine max	Improved Cultivar, East Asia	Hebei	China	24.0515
Fang et al 2017	Zhong_Huang_No.39	Glycine max	Improved Cultivar, East Asia	Beijing	China	18.8702
Fang et al 2017	Zhong_Huang_No.4	Glycine max	Improved Cultivar, East Asia	Beijing	China	7.52267
Fang et al 2017	Zhong_Huang_No.40	Glycine max	Improved Cultivar, East Asia	Shandong	China	24.7
Fang et al 2017	Zhong_Huang_No.41	Glycine max	Improved Cultivar, East Asia	Beijing	China	7.08452
Fang et al 2017	Zhong_Huang_No.43	Glycine max	Improved Cultivar, East Asia	Beijing	China	8.13278
Fang et al 2017	Zhong_Huang_No.44	Glycine max	Improved Cultivar, East Asia	Beijing	China	8.13931
Fang et al 2017	Zhong_Huang_No.48	Glycine max	Improved Cultivar, East Asia	Beijing	China	6.7454
Fang et al 2017	Zhong_Huang_No.49	Glycine max	Improved Cultivar, East Asia	Beijing	China	9.92563
Fang et al 2017	Zhong_Huang_No.50	Glycine max	Improved Cultivar, East Asia	Beijing	China	21.301
Fang et al 2017	Zhong_Huang_No.55	Glycine max	Improved Cultivar, East Asia	Beijing	China	7.91376
Fang et al 2017	Zhong_Huang_No.58	Glycine max	Improved Cultivar, East Asia	Beijing	China	7.29244
Fang et al 2017	Zhong_Huang_No.6	Glycine max	Improved Cultivar, East Asia	Beijing	China	9.97225
Fang et al 2017	Zhong_Huang_No.61	Glycine max	Improved Cultivar, East Asia	Beijing	China	10.4678
Fang et al 2017	Zhong_Huang_No.66	Glycine max	Improved Cultivar, East Asia	Beijing	China	8.6438
Fang et al 2017	Zhong_Huang_No.67	Glycine max	Improved Cultivar, East Asia	Beijing	China	7.79033
Fang et al 2017	Zhong_Ke_No.42	Glycine max	Improved Cultivar, East Asia	Beijing	China	9.17106
Fang et al 2017	Zhong_Pin_No.03-5363	Glycine max	Improved Cultivar, East Asia	Beijing	China	7.13606
Fang et al 2017	Zhong_Pin_No.03-5368	Glycine max	Improved Cultivar, East Asia	Beijing	China	9.33698
Fang et al 2017	Zhong_Pin_No.661	Glycine max	Improved Cultivar, East Asia	Beijing	China	7.86921
Fang et al 2017	Zhong_Zuo_No.5807	Glycine max	Improved Cultivar, East Asia	Beijing	China	9.57687
Fang et al 2017	Zhong_Zuo_No.9056	Glycine max	Improved Cultivar, East Asia	Beijing	China	8.77623
Fang et al 2017	Zhong_Zuo_No.J10153	Glycine max	Improved Cultivar, East Asia	Beijing	China	7.12398
Fang et al 2017	Zhong_Zuo_No.J8035	Glycine max	Improved Cultivar, East Asia	Tianjin	China	6.95498
Fang et al 2017	Zhong_Zuo_No.J9056	Glycine max	Improved Cultivar, East Asia	Beijing	China	8.64762
Fang et al 2017	Zhou_Dou_No.11	Glycine max	Improved Cultivar, East Asia	Henan	China	7.39732
Fang et al 2017	Zhou_Dou_No.12	Glycine max	Improved Cultivar, East Asia	Henan	China	12.8474
Fang et al 2017	Zhou_Dou_No.13	Glycine max	Improved Cultivar, East Asia	Henan	China	9.97788
Fang et al 2017	Zhou_Dou_No.17	Glycine max	Improved Cultivar, East Asia	Henan	China	8.81929
Fang et al 2017	Zhou_Dou_No.18	Glycine max	Improved Cultivar, East Asia	Henan	China	7.98968
Fang et al 2017	Zhou_Dou_No.19	Glycine max	Improved Cultivar, East Asia	Henan	China	14.4636
Happ et al 2019, 2021	Cang_Dou-11	Glycine max	Improved Cultivar, East Asia	Hebei	China	17.0629
Valliyodan et al 2016	PI437863A	Glycine max	Improved Cultivar, East Asia	.	China	22.9903
Valliyodan et al 2016	PI438258	Glycine max	Improved Cultivar, East Asia	.	China	23.067
Valliyodan et al 2016	PI464920B	Glycine max	Improved Cultivar, East Asia	.	China	23.2441
Valliyodan et al 2016	PI475783B	Glycine max	Improved Cultivar, East Asia	.	China	22.8357
Valliyodan et al 2016	PI561271	Glycine max	Improved Cultivar, East Asia	.	China	22.8938
Valliyodan et al 2016	PI567519	Glycine max	Improved Cultivar, East Asia	.	China	23.0489
Valliyodan et al 2016	PI567611	Glycine max	Improved Cultivar, East Asia	.	China	23.0065
Valliyodan et al 2016	PI567651	Glycine max	Improved Cultivar, East Asia	.	China	22.9807
Valliyodan et al 2016	PI567690	Glycine max	Improved Cultivar, East Asia	.	China	23.0315
Valliyodan et al 2016	PI567719	Glycine max	Improved Cultivar, East Asia	.	China	23.0686
Valliyodan et al 2016	PI567731	Glycine max	Improved Cultivar, East Asia	.	China	23.0135
Valliyodan et al 2016	PI594512A	Glycine max	Improved Cultivar, East Asia	.	China	26.0895
Valliyodan et al 2016	PI594599	Glycine max	Improved Cultivar, East Asia	.	China	23.0929
Fang et al 2017	Enrei	Glycine max	Improved Cultivar, East Asia	.	Japan	14.8895
Fang et al 2017	PI317334B	Glycine max	Improved Cultivar, East Asia	Hokkaido	Japan	33.4191
Fang et al 2017	Shi_Sheng_Chang_Ye	Glycine max	Improved Cultivar, East Asia	Hokkaido	Japan	7.06845
Fang et al 2017	TK780	Glycine max	Improved Cultivar, East Asia	Hokkaido	Japan	19.2205
Torkamaneh et al 2017	PI417015	Glycine max	Improved Cultivar, East Asia	.	Japan	23.7455
Valliyodan et al 2016	PI200508	Glycine max	Improved Cultivar, East Asia	.	Japan	22.7917
Valliyodan et al 2016	PI416937	Glycine max	Improved Cultivar, East Asia	.	Japan	25.8048
Valliyodan et al 2016	PI087617	Glycine max	Improved Cultivar, East Asia	.	North Korea	22.9724
Valliyodan et al 2016	PI603154	Glycine max	Improved Cultivar, East Asia	.	North Korea	23.1268
Valliyodan et al 2016	PI603170	Glycine max	Improved Cultivar, East Asia	.	North Korea	22.9972
Valliyodan et al 2016	PI603175	Glycine max	Improved Cultivar, East Asia	.	North Korea	26.3836
Valliyodan et al 2016	PI603176A	Glycine max	Improved Cultivar, East Asia	.	North Korea	23.0809
Valliyodan et al 2016	PI196175	Glycine max	Improved Cultivar, East Asia	.	South Korea	22.9651
Valliyodan et al 2016	PI398593	Glycine max	Improved Cultivar, East Asia	.	South Korea	22.5794
Valliyodan et al 2016	PI398595	Glycine max	Improved Cultivar, East Asia	.	South Korea	22.6421
Valliyodan et al 2016	PI398610	Glycine max	Improved Cultivar, East Asia	.	South Korea	22.6079
Valliyodan et al 2016	PI398614	Glycine max	Improved Cultivar, East Asia	.	South Korea	22.5722
Valliyodan et al 2016	PI407788A	Glycine max	Improved Cultivar, East Asia	.	South Korea	27.7751
Valliyodan et al 2016	PI407965	Glycine max	Improved Cultivar, East Asia	.	South Korea	23.0409
Valliyodan et al 2016	PI408105A	Glycine max	Improved Cultivar, East Asia	.	South Korea	22.61
Valliyodan et al 2016	PI594012	Glycine max	Improved Cultivar, East Asia	.	South Korea	22.9962
Happ et al 2019, 2021	S2	Glycine max	Improved Cultivar, Nebraska	Nebraska	United States	5.65088
Happ et al 2019, 2021	S4	Glycine max	Improved Cultivar, Nebraska	Nebraska	United States	2.65859
Happ et al 2019, 2021	S5	Glycine max	Improved Cultivar, Nebraska	Nebraska	United States	3.91002
Happ et al 2019, 2021	S6	Glycine max	Improved Cultivar, Nebraska	Nebraska	United States	12.4953
Happ et al 2019, 2021	S7	Glycine max	Improved Cultivar, Nebraska	Nebraska	United States	10.8531
Happ et al 2019, 2021	S8	Glycine max	Improved Cultivar, Nebraska	Nebraska	United States	12.7837
Happ et al 2019, 2021	S11	Glycine max	Improved Cultivar, Nebraska	Nebraska	United States	15.1439
Happ et al 2019, 2021	S12	Glycine max	Improved Cultivar, Nebraska	Nebraska	United States	8.57197
Happ et al 2019, 2021	S13	Glycine max	Improved Cultivar, Nebraska	Nebraska	United States	4.58385
Happ et al 2019, 2021	S14	Glycine max	Improved Cultivar, Nebraska	Nebraska	United States	8.92513
Happ et al 2019, 2021	S15	Glycine max	Improved Cultivar, Nebraska	Nebraska	United States	11.0995
Happ et al 2019, 2021	S16	Glycine max	Improved Cultivar, Nebraska	Nebraska	United States	19.0664
Happ et al 2019, 2021	S18	Glycine max	Improved Cultivar, Nebraska	Nebraska	United States	3.57451
Happ et al 2019, 2021	S220	Glycine max	Improved Cultivar, Nebraska	Nebraska	United States	7.408
Happ et al 2019, 2021	S19	Glycine max	Improved Cultivar, Nebraska	Nebraska	United States	3.53157
Happ et al 2019, 2021	S20	Glycine max	Improved Cultivar, Nebraska	Nebraska	United States	6.88544
Happ et al 2019, 2021	S21	Glycine max	Improved Cultivar, Nebraska	Nebraska	United States	3.41234
Happ et al 2019, 2021	S23	Glycine max	Improved Cultivar, Nebraska	Nebraska	United States	4.63506
Happ et al 2019, 2021	S26	Glycine max	Improved Cultivar, Nebraska	Nebraska	United States	12.9251
Happ et al 2019, 2021	S27	Glycine max	Improved Cultivar, Nebraska	Nebraska	United States	5.39532
Happ et al 2019, 2021	S28	Glycine max	Improved Cultivar, Nebraska	Nebraska	United States	8.4737
Happ et al 2019, 2021	S29	Glycine max	Improved Cultivar, Nebraska	Nebraska	United States	5.45186
Happ et al 2019, 2021	S221	Glycine max	Improved Cultivar, Nebraska	Nebraska	United States	12.68
Happ et al 2019, 2021	S30	Glycine max	Improved Cultivar, Nebraska	Nebraska	United States	5.05239
Happ et al 2019, 2021	S31	Glycine max	Improved Cultivar, Nebraska	Nebraska	United States	11.23
Happ et al 2019, 2021	S32	Glycine max	Improved Cultivar, Nebraska	Nebraska	United States	7.55311
Happ et al 2019, 2021	S33	Glycine max	Improved Cultivar, Nebraska	Nebraska	United States	16.8063
Happ et al 2019, 2021	S34	Glycine max	Improved Cultivar, Nebraska	Nebraska	United States	9.08639
Happ et al 2019, 2021	S35	Glycine max	Improved Cultivar, Nebraska	Nebraska	United States	4.84403
Happ et al 2019, 2021	S36	Glycine max	Improved Cultivar, Nebraska	Nebraska	United States	7.49667
Happ et al 2019, 2021	S37	Glycine max	Improved Cultivar, Nebraska	Nebraska	United States	3.06672
Happ et al 2019, 2021	S38	Glycine max	Improved Cultivar, Nebraska	Nebraska	United States	14.1006
Happ et al 2019, 2021	S39	Glycine max	Improved Cultivar, Nebraska	Nebraska	United States	15.6136
Happ et al 2019, 2021	S40	Glycine max	Improved Cultivar, Nebraska	Nebraska	United States	9.20621
Happ et al 2019, 2021	S41	Glycine max	Improved Cultivar, Nebraska	Nebraska	United States	10.5448
Happ et al 2019, 2021	S42	Glycine max	Improved Cultivar, Nebraska	Nebraska	United States	14.9644
Happ et al 2019, 2021	S43	Glycine max	Improved Cultivar, Nebraska	Nebraska	United States	10.4297
Happ et al 2019, 2021	S222	Glycine max	Improved Cultivar, Nebraska	Nebraska	United States	9.65783
Happ et al 2019, 2021	S45	Glycine max	Improved Cultivar, Nebraska	Nebraska	United States	5.27152
Happ et al 2019, 2021	S46	Glycine max	Improved Cultivar, Nebraska	Nebraska	United States	6.93278
Happ et al 2019, 2021	S47	Glycine max	Improved Cultivar, Nebraska	Nebraska	United States	6.68941
Happ et al 2019, 2021	S48	Glycine max	Improved Cultivar, Nebraska	Nebraska	United States	2.12412
Happ et al 2019, 2021	S49	Glycine max	Improved Cultivar, Nebraska	Nebraska	United States	4.38635
Happ et al 2019, 2021	S51	Glycine max	Improved Cultivar, Nebraska	Nebraska	United States	9.07923
Happ et al 2019, 2021	S52	Glycine max	Improved Cultivar, Nebraska	Nebraska	United States	9.50358
Happ et al 2019, 2021	S53	Glycine max	Improved Cultivar, Nebraska	Nebraska	United States	2.68163
Happ et al 2019, 2021	S54	Glycine max	Improved Cultivar, Nebraska	Nebraska	United States	12.0728
Happ et al 2019, 2021	S55	Glycine max	Improved Cultivar, Nebraska	Nebraska	United States	19.1271
Happ et al 2019, 2021	S56	Glycine max	Improved Cultivar, Nebraska	Nebraska	United States	7.94239
Happ et al 2019, 2021	S57	Glycine max	Improved Cultivar, Nebraska	Nebraska	United States	11.3687
Happ et al 2019, 2021	S58	Glycine max	Improved Cultivar, Nebraska	Nebraska	United States	4.31675
Happ et al 2019, 2021	S59	Glycine max	Improved Cultivar, Nebraska	Nebraska	United States	9.97606
Happ et al 2019, 2021	S60	Glycine max	Improved Cultivar, Nebraska	Nebraska	United States	6.03585
Happ et al 2019, 2021	S61	Glycine max	Improved Cultivar, Nebraska	Nebraska	United States	8.42559
Happ et al 2019, 2021	S62	Glycine max	Improved Cultivar, Nebraska	Nebraska	United States	9.1878
Happ et al 2019, 2021	S63	Glycine max	Improved Cultivar, Nebraska	Nebraska	United States	7.95529
Happ et al 2019, 2021	S64	Glycine max	Improved Cultivar, Nebraska	Nebraska	United States	4.12501
Happ et al 2019, 2021	S65	Glycine max	Improved Cultivar, Nebraska	Nebraska	United States	2.89885
Happ et al 2019, 2021	S66	Glycine max	Improved Cultivar, Nebraska	Nebraska	United States	6.68553
Happ et al 2019, 2021	S68	Glycine max	Improved Cultivar, Nebraska	Nebraska	United States	20.2006
Happ et al 2019, 2021	S70	Glycine max	Improved Cultivar, Nebraska	Nebraska	United States	7.72606
Happ et al 2019, 2021	S71	Glycine max	Improved Cultivar, Nebraska	Nebraska	United States	9.97182
Happ et al 2019, 2021	S72	Glycine max	Improved Cultivar, Nebraska	Nebraska	United States	7.37593
Happ et al 2019, 2021	S73	Glycine max	Improved Cultivar, Nebraska	Nebraska	United States	10.2225
Happ et al 2019, 2021	S74	Glycine max	Improved Cultivar, Nebraska	Nebraska	United States	5.18629
Happ et al 2019, 2021	S75	Glycine max	Improved Cultivar, Nebraska	Nebraska	United States	6.56674
Happ et al 2019, 2021	S76	Glycine max	Improved Cultivar, Nebraska	Nebraska	United States	5.83026
Happ et al 2019, 2021	S77	Glycine max	Improved Cultivar, Nebraska	Nebraska	United States	12.4919
Happ et al 2019, 2021	S78	Glycine max	Improved Cultivar, Nebraska	Nebraska	United States	4.02643
Happ et al 2019, 2021	S80	Glycine max	Improved Cultivar, Nebraska	Nebraska	United States	8.57074
Happ et al 2019, 2021	S81	Glycine max	Improved Cultivar, Nebraska	Nebraska	United States	16.2481
Happ et al 2019, 2021	S223	Glycine max	Improved Cultivar, Nebraska	Nebraska	United States	11.0808
Happ et al 2019, 2021	S83	Glycine max	Improved Cultivar, Nebraska	Nebraska	United States	11.0196
Happ et al 2019, 2021	S84	Glycine max	Improved Cultivar, Nebraska	Nebraska	United States	8.26244
Happ et al 2019, 2021	S85	Glycine max	Improved Cultivar, Nebraska	Nebraska	United States	5.54316
Happ et al 2019, 2021	S86	Glycine max	Improved Cultivar, Nebraska	Nebraska	United States	11.6735
Happ et al 2019, 2021	S87	Glycine max	Improved Cultivar, Nebraska	Nebraska	United States	7.78298
Happ et al 2019, 2021	S88	Glycine max	Improved Cultivar, Nebraska	Nebraska	United States	4.80481
Happ et al 2019, 2021	S89	Glycine max	Improved Cultivar, Nebraska	Nebraska	United States	10.5127
Happ et al 2019, 2021	S90	Glycine max	Improved Cultivar, Nebraska	Nebraska	United States	10.822
Happ et al 2019, 2021	S91	Glycine max	Improved Cultivar, Nebraska	Nebraska	United States	3.90205
Happ et al 2019, 2021	S92	Glycine max	Improved Cultivar, Nebraska	Nebraska	United States	6.4454
Happ et al 2019, 2021	S93	Glycine max	Improved Cultivar, Nebraska	Nebraska	United States	16.6845
Happ et al 2019, 2021	S94	Glycine max	Improved Cultivar, Nebraska	Nebraska	United States	7.96511
Happ et al 2019, 2021	S95	Glycine max	Improved Cultivar, Nebraska	Nebraska	United States	7.29582
Happ et al 2019, 2021	S96	Glycine max	Improved Cultivar, Nebraska	Nebraska	United States	2.8262
Happ et al 2019, 2021	S97	Glycine max	Improved Cultivar, Nebraska	Nebraska	United States	32.9955
Happ et al 2019, 2021	S98	Glycine max	Improved Cultivar, Nebraska	Nebraska	United States	7.58318
Happ et al 2019, 2021	S99	Glycine max	Improved Cultivar, Nebraska	Nebraska	United States	3.90118
Happ et al 2019, 2021	S100	Glycine max	Improved Cultivar, Nebraska	Nebraska	United States	12.567
Happ et al 2019, 2021	S101	Glycine max	Improved Cultivar, Nebraska	Nebraska	United States	7.41496
Happ et al 2019, 2021	S102	Glycine max	Improved Cultivar, Nebraska	Nebraska	United States	4.63648
Happ et al 2019, 2021	S103	Glycine max	Improved Cultivar, Nebraska	Nebraska	United States	3.18736
Happ et al 2019, 2021	S104	Glycine max	Improved Cultivar, Nebraska	Nebraska	United States	17.532
Happ et al 2019, 2021	S105	Glycine max	Improved Cultivar, Nebraska	Nebraska	United States	6.31005
Happ et al 2019, 2021	S106	Glycine max	Improved Cultivar, Nebraska	Nebraska	United States	8.8142
Happ et al 2019, 2021	S107	Glycine max	Improved Cultivar, Nebraska	Nebraska	United States	11.5041
Happ et al 2019, 2021	S108	Glycine max	Improved Cultivar, Nebraska	Nebraska	United States	14.6366
Happ et al 2019, 2021	S109	Glycine max	Improved Cultivar, Nebraska	Nebraska	United States	13.0729
Happ et al 2019, 2021	S224	Glycine max	Improved Cultivar, Nebraska	Nebraska	United States	8.22067
Happ et al 2019, 2021	S111	Glycine max	Improved Cultivar, Nebraska	Nebraska	United States	4.3045
Happ et al 2019, 2021	S112	Glycine max	Improved Cultivar, Nebraska	Nebraska	United States	3.59148
Happ et al 2019, 2021	S113	Glycine max	Improved Cultivar, Nebraska	Nebraska	United States	5.26787
Happ et al 2019, 2021	S114	Glycine max	Improved Cultivar, Nebraska	Nebraska	United States	11.1187
Happ et al 2019, 2021	S115	Glycine max	Improved Cultivar, Nebraska	Nebraska	United States	6.53406
Happ et al 2019, 2021	S117	Glycine max	Improved Cultivar, Nebraska	Nebraska	United States	7.37579
Happ et al 2019, 2021	S118	Glycine max	Improved Cultivar, Nebraska	Nebraska	United States	7.43369
Happ et al 2019, 2021	S119	Glycine max	Improved Cultivar, Nebraska	Nebraska	United States	20.8716
Happ et al 2019, 2021	S120	Glycine max	Improved Cultivar, Nebraska	Nebraska	United States	8.33698
Happ et al 2019, 2021	S121	Glycine max	Improved Cultivar, Nebraska	Nebraska	United States	6.15193
Happ et al 2019, 2021	S122	Glycine max	Improved Cultivar, Nebraska	Nebraska	United States	23.0744
Happ et al 2019, 2021	S123	Glycine max	Improved Cultivar, Nebraska	Nebraska	United States	9.28346
Happ et al 2019, 2021	S124	Glycine max	Improved Cultivar, Nebraska	Nebraska	United States	3.31556
Happ et al 2019, 2021	S125	Glycine max	Improved Cultivar, Nebraska	Nebraska	United States	7.83712
Happ et al 2019, 2021	S126	Glycine max	Improved Cultivar, Nebraska	Nebraska	United States	2.21118
Happ et al 2019, 2021	S127	Glycine max	Improved Cultivar, Nebraska	Nebraska	United States	10.9886
Happ et al 2019, 2021	S128	Glycine max	Improved Cultivar, Nebraska	Nebraska	United States	6.59887
Happ et al 2019, 2021	S129	Glycine max	Improved Cultivar, Nebraska	Nebraska	United States	7.4104
Happ et al 2019, 2021	S130	Glycine max	Improved Cultivar, Nebraska	Nebraska	United States	26.0441
Happ et al 2019, 2021	S131	Glycine max	Improved Cultivar, Nebraska	Nebraska	United States	11.6909
Happ et al 2019, 2021	S132	Glycine max	Improved Cultivar, Nebraska	Nebraska	United States	6.95977
Happ et al 2019, 2021	S133	Glycine max	Improved Cultivar, Nebraska	Nebraska	United States	9.65511
Happ et al 2019, 2021	S134	Glycine max	Improved Cultivar, Nebraska	Nebraska	United States	7.26685
Happ et al 2019, 2021	S135	Glycine max	Improved Cultivar, Nebraska	Nebraska	United States	10.7779
Happ et al 2019, 2021	S136	Glycine max	Improved Cultivar, Nebraska	Nebraska	United States	6.69969
Happ et al 2019, 2021	S137	Glycine max	Improved Cultivar, Nebraska	Nebraska	United States	11.0519
Happ et al 2019, 2021	S138	Glycine max	Improved Cultivar, Nebraska	Nebraska	United States	1.03328
Happ et al 2019, 2021	S139	Glycine max	Improved Cultivar, Nebraska	Nebraska	United States	2.79819
Happ et al 2019, 2021	S140	Glycine max	Improved Cultivar, Nebraska	Nebraska	United States	6.47381
Happ et al 2019, 2021	S141	Glycine max	Improved Cultivar, Nebraska	Nebraska	United States	15.3706
Happ et al 2019, 2021	S142	Glycine max	Improved Cultivar, Nebraska	Nebraska	United States	2.46284
Happ et al 2019, 2021	S143	Glycine max	Improved Cultivar, Nebraska	Nebraska	United States	7.03282
Happ et al 2019, 2021	S144	Glycine max	Improved Cultivar, Nebraska	Nebraska	United States	10.8381
Happ et al 2019, 2021	S225	Glycine max	Improved Cultivar, Nebraska	Nebraska	United States	11.611
Happ et al 2019, 2021	S147	Glycine max	Improved Cultivar, Nebraska	Nebraska	United States	3.84836
Happ et al 2019, 2021	S148	Glycine max	Improved Cultivar, Nebraska	Nebraska	United States	12.5316
Happ et al 2019, 2021	S149	Glycine max	Improved Cultivar, Nebraska	Nebraska	United States	8.30383
Happ et al 2019, 2021	S150	Glycine max	Improved Cultivar, Nebraska	Nebraska	United States	8.38431
Happ et al 2019, 2021	S151	Glycine max	Improved Cultivar, Nebraska	Nebraska	United States	21.3882
Happ et al 2019, 2021	S152	Glycine max	Improved Cultivar, Nebraska	Nebraska	United States	27.2285
Happ et al 2019, 2021	S153	Glycine max	Improved Cultivar, Nebraska	Nebraska	United States	6.5291
Happ et al 2019, 2021	S154	Glycine max	Improved Cultivar, Nebraska	Nebraska	United States	21.2445
Happ et al 2019, 2021	S155	Glycine max	Improved Cultivar, Nebraska	Nebraska	United States	16.7189
Happ et al 2019, 2021	S156	Glycine max	Improved Cultivar, Nebraska	Nebraska	United States	9.46877
Happ et al 2019, 2021	S157	Glycine max	Improved Cultivar, Nebraska	Nebraska	United States	6.09322
Happ et al 2019, 2021	S158	Glycine max	Improved Cultivar, Nebraska	Nebraska	United States	5.78815
Happ et al 2019, 2021	S159	Glycine max	Improved Cultivar, Nebraska	Nebraska	United States	9.96546
Happ et al 2019, 2021	S160	Glycine max	Improved Cultivar, Nebraska	Nebraska	United States	8.29375
Happ et al 2019, 2021	S161	Glycine max	Improved Cultivar, Nebraska	Nebraska	United States	26.8843
Happ et al 2019, 2021	S162	Glycine max	Improved Cultivar, Nebraska	Nebraska	United States	9.61354
Happ et al 2019, 2021	S163	Glycine max	Improved Cultivar, Nebraska	Nebraska	United States	4.38889
Happ et al 2019, 2021	S226	Glycine max	Improved Cultivar, Nebraska	Nebraska	United States	10.6344
Happ et al 2019, 2021	S164	Glycine max	Improved Cultivar, Nebraska	Nebraska	United States	14.7665
Happ et al 2019, 2021	S165	Glycine max	Improved Cultivar, Nebraska	Nebraska	United States	11.0162
Happ et al 2019, 2021	S167	Glycine max	Improved Cultivar, Nebraska	Nebraska	United States	5.67478
Happ et al 2019, 2021	S168	Glycine max	Improved Cultivar, Nebraska	Nebraska	United States	6.14111
Happ et al 2019, 2021	S170	Glycine max	Improved Cultivar, Nebraska	Nebraska	United States	30.6704
Happ et al 2019, 2021	S171	Glycine max	Improved Cultivar, Nebraska	Nebraska	United States	6.33887
Happ et al 2019, 2021	S172	Glycine max	Improved Cultivar, Nebraska	Nebraska	United States	7.9286
Happ et al 2019, 2021	S173	Glycine max	Improved Cultivar, Nebraska	Nebraska	United States	1.89287
Happ et al 2019, 2021	S174	Glycine max	Improved Cultivar, Nebraska	Nebraska	United States	14.3929
Happ et al 2019, 2021	S175	Glycine max	Improved Cultivar, Nebraska	Nebraska	United States	1.5482
Happ et al 2019, 2021	S176	Glycine max	Improved Cultivar, Nebraska	Nebraska	United States	12.8317
Happ et al 2019, 2021	S177	Glycine max	Improved Cultivar, Nebraska	Nebraska	United States	8.11213
Happ et al 2019, 2021	S178	Glycine max	Improved Cultivar, Nebraska	Nebraska	United States	11.2223
Happ et al 2019, 2021	S179	Glycine max	Improved Cultivar, Nebraska	Nebraska	United States	14.7617
Happ et al 2019, 2021	S180	Glycine max	Improved Cultivar, Nebraska	Nebraska	United States	12.6868
Happ et al 2019, 2021	S181	Glycine max	Improved Cultivar, Nebraska	Nebraska	United States	9.95031
Happ et al 2019, 2021	S182	Glycine max	Improved Cultivar, Nebraska	Nebraska	United States	8.99085
Happ et al 2019, 2021	S183	Glycine max	Improved Cultivar, Nebraska	Nebraska	United States	14.3318
Happ et al 2019, 2021	S184	Glycine max	Improved Cultivar, Nebraska	Nebraska	United States	8.29176
Happ et al 2019, 2021	S227	Glycine max	Improved Cultivar, Nebraska	Nebraska	United States	12.4686
Happ et al 2019, 2021	S186	Glycine max	Improved Cultivar, Nebraska	Nebraska	United States	9.62819
Happ et al 2019, 2021	S187	Glycine max	Improved Cultivar, Nebraska	Nebraska	United States	6.85849
Happ et al 2019, 2021	S188	Glycine max	Improved Cultivar, Nebraska	Nebraska	United States	16.643
Happ et al 2019, 2021	S189	Glycine max	Improved Cultivar, Nebraska	Nebraska	United States	5.67984
Happ et al 2019, 2021	S190	Glycine max	Improved Cultivar, Nebraska	Nebraska	United States	11.8465
Happ et al 2019, 2021	S191	Glycine max	Improved Cultivar, Nebraska	Nebraska	United States	8.67222
Happ et al 2019, 2021	S192	Glycine max	Improved Cultivar, Nebraska	Nebraska	United States	14.7655
Happ et al 2019, 2021	S193	Glycine max	Improved Cultivar, Nebraska	Nebraska	United States	5.59108
Happ et al 2019, 2021	S194	Glycine max	Improved Cultivar, Nebraska	Nebraska	United States	16.1068
Happ et al 2019, 2021	S196	Glycine max	Improved Cultivar, Nebraska	Nebraska	United States	26.6817
Happ et al 2019, 2021	S197	Glycine max	Improved Cultivar, Nebraska	Nebraska	United States	6.46711
Happ et al 2019, 2021	S198	Glycine max	Improved Cultivar, Nebraska	Nebraska	United States	13.6659
Happ et al 2019, 2021	S199	Glycine max	Improved Cultivar, Nebraska	Nebraska	United States	11.4928
Happ et al 2019, 2021	S200	Glycine max	Improved Cultivar, Nebraska	Nebraska	United States	15.527
Happ et al 2019, 2021	S201	Glycine max	Improved Cultivar, Nebraska	Nebraska	United States	4.76518
Happ et al 2019, 2021	S202	Glycine max	Improved Cultivar, Nebraska	Nebraska	United States	5.67501
Happ et al 2019, 2021	S203	Glycine max	Improved Cultivar, Nebraska	Nebraska	United States	14.0536
Happ et al 2019, 2021	S204	Glycine max	Improved Cultivar, Nebraska	Nebraska	United States	9.60927
Happ et al 2019, 2021	S205	Glycine max	Improved Cultivar, Nebraska	Nebraska	United States	13.0368
Happ et al 2019, 2021	S206	Glycine max	Improved Cultivar, Nebraska	Nebraska	United States	15.6719
Happ et al 2019, 2021	S207	Glycine max	Improved Cultivar, Nebraska	Nebraska	United States	7.98348
Happ et al 2019, 2021	S208	Glycine max	Improved Cultivar, Nebraska	Nebraska	United States	24.5757
Happ et al 2019, 2021	S210	Glycine max	Improved Cultivar, Nebraska	Nebraska	United States	3.10921
Happ et al 2019, 2021	S211	Glycine max	Improved Cultivar, Nebraska	Nebraska	United States	3.67961
Happ et al 2019, 2021	S212	Glycine max	Improved Cultivar, Nebraska	Nebraska	United States	3.9302
Happ et al 2019, 2021	S213	Glycine max	Improved Cultivar, Nebraska	Nebraska	United States	11.2921
Happ et al 2019, 2021	S214	Glycine max	Improved Cultivar, Nebraska	Nebraska	United States	14.4522
Happ et al 2019, 2021	S216	Glycine max	Improved Cultivar, Nebraska	Nebraska	United States	7.28415
Happ et al 2019, 2021	S228	Glycine max	Improved Cultivar, Nebraska	Nebraska	United States	6.4084
Happ et al 2019, 2021	S217	Glycine max	Improved Cultivar, Nebraska	Nebraska	United States	17.1318
Happ et al 2019, 2021	S218	Glycine max	Improved Cultivar, Nebraska	Nebraska	United States	8.7703
Fang et al 2017	Amsoy	Glycine max	Improved Cultivar, US (non Nebraska)	Iowa	United States	7.49885
Fang et al 2017	Beeson	Glycine max	Improved Cultivar, US (non Nebraska)	Indiana	United States	8.45598
Fang et al 2017	FC_33243	Glycine max	Improved Cultivar, US (non Nebraska)	Iowa	United States	43.7801
Fang et al 2017	Lincoln	Glycine max	Improved Cultivar, US (non Nebraska)	Illinois	United States	8.12673
Fang et al 2017	Mei_Guo_Da_Dou	Glycine max	Improved Cultivar, US (non Nebraska)	.	United States	7.53619
Fang et al 2017	Mei_Guo_Hak08g	Glycine max	Improved Cultivar, US (non Nebraska)	.	United States	8.94012
Fang et al 2017	Mei_No.2	Glycine max	Improved Cultivar, US (non Nebraska)	.	United States	9.0994
Fang et al 2017	PI508083	Glycine max	Improved Cultivar, US (non Nebraska)	Minnesota	United States	55.749
Fang et al 2017	PI508266	Glycine max	Improved Cultivar, US (non Nebraska)	North Carolina	United States	31.3004
Fang et al 2017	PI513382	Glycine max	Improved Cultivar, US (non Nebraska)	Minnesota	United States	21.1565
Fang et al 2017	PI515961	Glycine max	Improved Cultivar, US (non Nebraska)	Kentucky	United States	24.3664
Fang et al 2017	PI533602	Glycine max	Improved Cultivar, US (non Nebraska)	Arkansas	United States	44.6248
Fang et al 2017	PI533655	Glycine max	Improved Cultivar, US (non Nebraska)	Illinois	United States	38.7575
Fang et al 2017	PI536635	Glycine max	Improved Cultivar, US (non Nebraska)	Ohio	United States	17.4311
Fang et al 2017	PI540552	Glycine max	Improved Cultivar, US (non Nebraska)	Ohio	United States	38.2394
Fang et al 2017	PI542403	Glycine max	Improved Cultivar, US (non Nebraska)	Minnesota	United States	26.7318
Fang et al 2017	PI547409	Glycine max	Improved Cultivar, US (non Nebraska)	Illinois	United States	11.5432
Fang et al 2017	PI547459	Glycine max	Improved Cultivar, US (non Nebraska)	Illinois	United States	40.8015
Fang et al 2017	PI547460	Glycine max	Improved Cultivar, US (non Nebraska)	Illinois	United States	21.3981
Fang et al 2017	PI547488	Glycine max	Improved Cultivar, US (non Nebraska)	Illinois	United States	8.17291
Fang et al 2017	PI547562	Glycine max	Improved Cultivar, US (non Nebraska)	Illinois	United States	21.1457
Fang et al 2017	PI547680	Glycine max	Improved Cultivar, US (non Nebraska)	Illinois	United States	23.3649
Fang et al 2017	PI547686	Glycine max	Improved Cultivar, US (non Nebraska)	Illinois	United States	24.8701
Fang et al 2017	PI547690	Glycine max	Improved Cultivar, US (non Nebraska)	Illinois	United States	21.4064
Fang et al 2017	PI547716	Glycine max	Improved Cultivar, US (non Nebraska)	Illinois	United States	25.5435
Fang et al 2017	PI547779	Glycine max	Improved Cultivar, US (non Nebraska)	Illinois	United States	20.1358
Fang et al 2017	PI548182	Glycine max	Improved Cultivar, US (non Nebraska)	Illinois	United States	27.1773
Fang et al 2017	PI548190	Glycine max	Improved Cultivar, US (non Nebraska)	Illinois	United States	33.4042
Fang et al 2017	PI548362	Glycine max	Improved Cultivar, US (non Nebraska)	Illinois	United States	23.9566
Fang et al 2017	PI548477	Glycine max	Improved Cultivar, US (non Nebraska)	Tennessee	United States	22.0536
Fang et al 2017	PI548512	Glycine max	Improved Cultivar, US (non Nebraska)	Indiana	United States	18.2442
Fang et al 2017	PI548520	Glycine max	Improved Cultivar, US (non Nebraska)	Iowa	United States	35.204
Fang et al 2017	PI548524	Glycine max	Improved Cultivar, US (non Nebraska)	Iowa	United States	16.6754
Fang et al 2017	PI548533_Clark	Glycine max	Improved Cultivar, US (non Nebraska)	Illinois	United States	7.55795
Fang et al 2017	PI548540	Glycine max	Improved Cultivar, US (non Nebraska)	Iowa	United States	33.0304
Fang et al 2017	PI548560_Evans	Glycine max	Improved Cultivar, US (non Nebraska)	Minnesota	United States	6.9182
Fang et al 2017	PI548565	Glycine max	Improved Cultivar, US (non Nebraska)	Ohio	United States	20.4871
Fang et al 2017	PI548603	Glycine max	Improved Cultivar, US (non Nebraska)	Indiana	United States	9.83263
Fang et al 2017	PI548604	Glycine max	Improved Cultivar, US (non Nebraska)	Missouri	United States	26.9829
Fang et al 2017	PI548631	Glycine max	Improved Cultivar, US (non Nebraska)	Illinois	United States	24.6104
Fang et al 2017	PI548634	Glycine max	Improved Cultivar, US (non Nebraska)	Ohio	United States	19.4821
Fang et al 2017	PI548985	Glycine max	Improved Cultivar, US (non Nebraska)	South Carolina	United States	21.5641
Fang et al 2017	PI553047	Glycine max	Improved Cultivar, US (non Nebraska)	Georgia	United States	20.9508
Fang et al 2017	PI591495	Glycine max	Improved Cultivar, US (non Nebraska)	Illinois	United States	23.0382
Fang et al 2017	PI591511	Glycine max	Improved Cultivar, US (non Nebraska)	Illinois	United States	25.0813
Fang et al 2017	PI591541	Glycine max	Improved Cultivar, US (non Nebraska)	Illinois	United States	22.4734
Fang et al 2017	PI634883	Glycine max	Improved Cultivar, US (non Nebraska)	Illinois	United States	19.0798
Fang et al 2017	SRF_300	Glycine max	Improved Cultivar, US (non Nebraska)	Illinois	United States	7.36605
Torkamaneh et al 2017	V71-370	Glycine max	Improved Cultivar, US (non Nebraska)	.	United States	22.6278
Valliyodan et al 2016	IA3023	Glycine max	Improved Cultivar, US (non Nebraska)	.	United States	22.934
Valliyodan et al 2016	PI518664	Glycine max	Improved Cultivar, US (non Nebraska)	Virginia	United States	17.3511
Valliyodan et al 2016	PI542044	Glycine max	Improved Cultivar, US (non Nebraska)	.	United States	25.252
Valliyodan et al 2016	PI547862	Glycine max	Improved Cultivar, US (non Nebraska)	.	United States	22.8904
Valliyodan et al 2016	PI548511	Glycine max	Improved Cultivar, US (non Nebraska)	.	United States	22.8482
Valliyodan et al 2016	PI548657	Glycine max	Improved Cultivar, US (non Nebraska)	North Carolina	United States	22.6313
Valliyodan et al 2016	PI548667	Glycine max	Improved Cultivar, US (non Nebraska)	.	United States	24.9986
Valliyodan et al 2016	PI552538	Glycine max	Improved Cultivar, US (non Nebraska)	.	United States	23.345
Valliyodan et al 2016	PI591539	Glycine max	Improved Cultivar, US (non Nebraska)	.	United States	22.8734
Valliyodan et al 2016	PI639740	Glycine max	Improved Cultivar, US (non Nebraska)	.	United States	23.2803
Valliyodan et al 2016	PI647086	Glycine max	Improved Cultivar, US (non Nebraska)	.	United States	23.0987
Valliyodan et al 2016	S-100	Glycine max	Improved Cultivar, US (non Nebraska)	.	United States	22.8238
Valliyodan et al 2016	S05-11482	Glycine max	Improved Cultivar, US (non Nebraska)	.	United States	28.4437
Valliyodan et al 2016	S07-5049	Glycine max	Improved Cultivar, US (non Nebraska)	.	United States	22.6834
Valliyodan et al 2016	S10-11227	Glycine max	Improved Cultivar, US (non Nebraska)	.	United States	30.2741
Torkamaneh et al 2017	FC_31721	Glycine max	Landrace	.	.	24.3239
Fang et al 2017	PI153262	Glycine max	Landrace	.	Belgium	26.7255
Fang et al 2017	23P_3	Glycine max	Landrace	North	China	7.99555
Fang et al 2017	58_161	Glycine max	Landrace	Jiangsu	China	8.16223
Fang et al 2017	85_140	Glycine max	Landrace	North	China	8.0321
Fang et al 2017	Bai_Gun_Dou	Glycine max	Landrace	Gansu	China	6.74184
Fang et al 2017	Bai_Ke_Dou	Glycine max	Landrace	Shaanxi	China	6.75937
Fang et al 2017	Bai_Lu_Dou	Glycine max	Landrace	Shanxi	China	18.6568
Fang et al 2017	Bai_Mao_Dou	Glycine max	Landrace	Hubei	China	17.859
Fang et al 2017	Bai_Mei_Xiao_Qing_Dou	Glycine max	Landrace	Shandong	China	8.20615
Fang et al 2017	Bai_PIZi	Glycine max	Landrace	Liaoning	China	11.9524
Fang et al 2017	Bai_Qi_Da_Wan_Dou	Glycine max	Landrace	Hebei	China	6.50544
Fang et al 2017	Bai_Tian_Shu_Xiao_Huang_Dou	Glycine max	Landrace	Shandong	China	8.74971
Fang et al 2017	Bai_Zhen_Zhu	Glycine max	Landrace	Gansu	China	7.7806
Fang et al 2017	Bao_Ji_Mu	Glycine max	Landrace	Sichuan	China	7.53338
Fang et al 2017	Bei_Chuan_Da_Yang_Wei_Ba	Glycine max	Landrace	Sichuan	China	9.13013
Fang et al 2017	Bei_Chuan_Tu_Er_Dou	Glycine max	Landrace	Sichuan	China	5.85192
Fang et al 2017	Bei_Chuan_Wu_Yan_Wo	Glycine max	Landrace	Sichuan	China	11.754
Fang et al 2017	Bei_Jing_Xiao_Hei_Dou	Glycine max	Landrace	Beijing	China	7.27493
Fang et al 2017	Ben_Di_Da_Huang_Dou	Glycine max	Landrace	South	China	8.31645
Fang et al 2017	Bi_Yang_Niu_Mao_Huang	Glycine max	Landrace	Henan	China	6.14855
Fang et al 2017	Bi_Yang_Xiao_Zi_Huang	Glycine max	Landrace	Henan	China	6.25575
Fang et al 2017	Bian_g2_3	Glycine max	Landrace	North	China	7.62544
Fang et al 2017	Bian_Hei_Dou	Glycine max	Landrace	Liaoning	China	7.04064
Fang et al 2017	Bian_Zhuang_Da_Dou	Glycine max	Landrace	Shanxi	China	7.3058
Fang et al 2017	Bin_Hai_Da_Bai_Hua_Jia	Glycine max	Landrace	Jiangsu	China	6.75092
Fang et al 2017	Bin_Hai_Da_huang_Ke_Zi_Jia	Glycine max	Landrace	Jiangsu	China	21.9257
Fang et al 2017	Bo_Ai_Hong_PIZao_Jiao	Glycine max	Landrace	Henan	China	7.57349
Fang et al 2017	Bo_Di_Gao	Glycine max	Landrace	Jilin	China	6.43656
Fang et al 2017	Bo_Tou_Qing_PIDou	Glycine max	Landrace	Hebei	China	7.25793
Fang et al 2017	Cai_Lyu_Dou	Glycine max	Landrace	Shaanxi	China	8.23794
Fang et al 2017	Cang_Zhou_Da_Qing_Dou	Glycine max	Landrace	Hebei	China	8.49846
Fang et al 2017	Cha_Dou	Glycine max	Landrace	Shandong	China	8.82498
Fang et al 2017	Cha_Mo_Shi_Dou	Glycine max	Landrace	Jilin	China	8.63209
Fang et al 2017	Chang_Chun_Man_Cang_Jin	Glycine max	Landrace	Jilin	China	7.21091
Fang et al 2017	Chang_Ji_Huang_Dou_1	Glycine max	Landrace	Xinjiang	China	8.71157
Fang et al 2017	Chang_Ji_Huang_Dou_2	Glycine max	Landrace	Xinjiang	China	7.5687
Fang et al 2017	Chang_Yuan_Xiao_Tian_E_Dan	Glycine max	Landrace	Henan	China	6.89859
Fang et al 2017	Chen_Liu_Niu_Mao_Huang	Glycine max	Landrace	Henan	China	7.73666
Fang et al 2017	Chi_Cheng_Lyu_Huang_Dou	Glycine max	Landrace	Hebei	China	10.5547
Fang et al 2017	Cu_Dou	Glycine max	Landrace	Zhejiang	China	19.4447
Fang et al 2017	Da_Bai_Mei	Glycine max	Landrace	Liaoning	China	8.10929
Fang et al 2017	Da_Bai_Pi	Glycine max	Landrace	South	China	7.64909
Fang et al 2017	Da_Bai_Qi	Glycine max	Landrace	Liaoning	China	8.08087
Fang et al 2017	Da_He_Dou	Glycine max	Landrace	Hebei	China	7.30794
Fang et al 2017	Da_Hei_Dou	Glycine max	Landrace	Hebei	China	8.46539
Fang et al 2017	Da_Hei_Qi	Glycine max	Landrace	South	China	7.6466
Fang et al 2017	Da_Hong_Dou	Glycine max	Landrace	Anhui	China	8.67621
Fang et al 2017	Da_Hua_Pi	Glycine max	Landrace	Shandong	China	6.28701
Fang et al 2017	Da_Huang_Dou	Glycine max	Landrace	Innermongolia	China	8.68274
Fang et al 2017	Da_Huang_Jia	Glycine max	Landrace	Hebei	China	8.92797
Fang et al 2017	Da_Jiao_Ni_Dou	Glycine max	Landrace	Shandong	China	9.43985
Fang et al 2017	Da_Li_Hei	Glycine max	Landrace	Liaoning	China	6.60372
Fang et al 2017	Da_Li_Hei_Dou	Glycine max	Landrace	Hebei	China	8.35775
Fang et al 2017	Da_Li_Huang	Glycine max	Landrace	Jilin	China	19.7729
Fang et al 2017	Da_Li_Huang_Dou	Glycine max	Landrace	Shaanxi	China	6.12437
Fang et al 2017	Da_Li_Qing	Glycine max	Landrace	Liaoning	China	8.69597
Fang et al 2017	Da_Qing_Ren	Glycine max	Landrace	Shanxi	China	22.0431
Fang et al 2017	Da_Tian_E_Dan	Glycine max	Landrace	South	China	8.17289
Fang et al 2017	Da_Tun_Xiao_Hei_Dou	Glycine max	Landrace	Hebei	China	19.9019
Fang et al 2017	Da_Xing_Qing_Dou	Glycine max	Landrace	Beijing	China	12.4032
Fang et al 2017	Da_Zi_Qi_	Glycine max	Landrace	Liaoning	China	8.4744
Fang et al 2017	Dai_Mi_Dou	Glycine max	Landrace	Hubei	China	19.9959
Fang et al 2017	Dan_Cheng_Lao_Shu_Yan	Glycine max	Landrace	Henan	China	8.58648
Fang et al 2017	Dang_Nian_Chen	Glycine max	Landrace	Hebei	China	8.19563
Fang et al 2017	Di_Liu_Huang_Dou-2	Glycine max	Landrace	Hebei	China	7.33975
Fang et al 2017	Dong_Shan_Bai_Ma_Dou	Glycine max	Landrace	Fujian	China	18.6542
Fang et al 2017	Dong_Yin_Xiao_Li_Dou	Glycine max	Landrace	North	China	13.3414
Fang et al 2017	Dunfield	Glycine max	Landrace	Jilin	China	8.32148
Fang et al 2017	E182	Glycine max	Landrace	Beijing	China	7.24668
Fang et al 2017	Er_Huang_Yang	Glycine max	Landrace	Hebei	China	8.27797
Fang et al 2017	Fang_Shan_Huang_Dou	Glycine max	Landrace	Beijing	China	8.89828
Fang et al 2017	Fang_Zheng_Mo_Shi_Dou	Glycine max	Landrace	Heilongjiang	China	6.17503
Fang et al 2017	Feng_Xian_Sui_Dao_Huang	Glycine max	Landrace	Shanghai	China	8.71268
Fang et al 2017	Fo_Ding_Zhu	Glycine max	Landrace	Shandong	China	8.79173
Fang et al 2017	Gong_Xian_Er_Ji_Zao	Glycine max	Landrace	Sichuan	China	9.05328
Fang et al 2017	Guan_Nan_Chun_Hei_Dou	Glycine max	Landrace	Jiangsu	China	9.66133
Fang et al 2017	Guan_Yun_Hai_Bai_Hua	Glycine max	Landrace	Jiangsu	China	7.03032
Fang et al 2017	Guan_Yun_Mao_Ye_Dou	Glycine max	Landrace	Jiangsu	China	6.65714
Fang et al 2017	Guang_Rao_Da_Qing_Dou	Glycine max	Landrace	Shandong	China	29.4544
Fang et al 2017	Guo_Yang_Da_Jian_Ke	Glycine max	Landrace	Anhui	China	7.02158
Fang et al 2017	He_Long_You_Tai	Glycine max	Landrace	Jilin	China	7.86727
Fang et al 2017	He_Nan_Chun	Glycine max	Landrace	Shandong	China	7.07792
Fang et al 2017	He_Nan_Xiao_You_Dou	Glycine max	Landrace	Henan	China	7.79048
Fang et al 2017	Hei_Dou_GD	Glycine max	Landrace	Guangdong	China	14.9285
Fang et al 2017	Hei_Dou_LN	Glycine max	Landrace	Liaoning	China	6.33571
Fang et al 2017	Hei_Gun_Dou	Glycine max	Landrace	South	China	9.24057
Fang et al 2017	Hei_He_Xiao_Huang_Dou	Glycine max	Landrace	Heilongjiang	China	19.419
Fang et al 2017	Hei_Jia_PILyu_Qing_Dou	Glycine max	Landrace	South	China	7.33316
Fang et al 2017	Hei_Qi_Huang_Dou	Glycine max	Landrace	Liaoning	China	7.48539
Fang et al 2017	Hei_Wa_Shi_Dou	Glycine max	Landrace	Jilin	China	15.5857
Fang et al 2017	Hei_Yao_Huang_Dou	Glycine max	Landrace	Shaanxi	China	7.98224
Fang et al 2017	Heng_Feng_Wu_Dou	Glycine max	Landrace	Jiangxi	China	9.22616
Fang et al 2017	HK_12	Glycine max	Landrace	North	China	7.84987
Fang et al 2017	HKRdes_Zao	Glycine max	Landrace	South	China	7.02933
Fang et al 2017	Hong_Da_Dou	Glycine max	Landrace	Liaoning	China	8.36767
Fang et al 2017	Hong_Hu_Liu_Yue_Bao	Glycine max	Landrace	Hubei	China	18.0526
Fang et al 2017	Hong_Hua_Dou	Glycine max	Landrace	Shandong	China	7.55474
Fang et al 2017	Hong_Tong_Xiao_Hei_Dou	Glycine max	Landrace	Shanxi	China	6.87509
Fang et al 2017	Hong_Zhu_Dou	Glycine max	Landrace	Hunan	China	17.308
Fang et al 2017	Hua_Ting_Yang_Yan_Jing_Dou	Glycine max	Landrace	Gansu	China	8.24796
Fang et al 2017	Huai_De_Bai_Hua_Da_Li	Glycine max	Landrace	Jilin	China	7.23015
Fang et al 2017	Huai_Yang_Chun_Dou	Glycine max	Landrace	Jiangsu	China	9.71574
Fang et al 2017	Huan_Xian_Yang_Yan_Jing_Dou	Glycine max	Landrace	Gansu	China	7.91404
Fang et al 2017	Huang_Dou_1	Glycine max	Landrace	Hebei	China	7.73561
Fang et al 2017	Huang_Dou_2	Glycine max	Landrace	North	China	12.2632
Fang et al 2017	Huang_Huai_Dou	Glycine max	Landrace	Shaanxi	China	10.3405
Fang et al 2017	Huang_Mao_Dou	Glycine max	Landrace	Hunan	China	7.66408
Fang et al 2017	Huang_Qi	Glycine max	Landrace	North	China	8.47111
Fang et al 2017	Huang_Shou_Gan_Dou	Glycine max	Landrace	South	China	8.13563
Fang et al 2017	Hui_Bu_Zhi	Glycine max	Landrace	Shanxi	China	13.2742
Fang et al 2017	Hui_Lin_Qing	Glycine max	Landrace	Shanxi	China	9.18432
Fang et al 2017	Hui_Mao_Bian_Jing	Glycine max	Landrace	Liaoning	China	9.58366
Fang et al 2017	Hui_Min_Tu_Zi_Yan	Glycine max	Landrace	Shandong	China	8.03307
Fang et al 2017	Ji_Mo_You_Dou	Glycine max	Landrace	Shandong	China	9.81127
Fang et al 2017	Ji_Shan_De_Da_Li_Hei_Dou	Glycine max	Landrace	Shanxi	China	34.498
Fang et al 2017	Ji_Shi_Bai_Hua	Glycine max	Landrace	South	China	8.51972
Fang et al 2017	Ji_Yuan_Shui_Bai_Dou	Glycine max	Landrace	Henan	China	9.17319
Fang et al 2017	Jie_Jie_Si	Glycine max	Landrace	Anhui	China	7.99815
Fang et al 2017	Jin_Huang_No.35	Glycine max	Landrace	Hubei	China	20.5632
Fang et al 2017	Jin_Shan_Cha_Zhu_Shi_Dou	Glycine max	Landrace	Jilin	China	18.2984
Fang et al 2017	Jin_Yuan	Glycine max	Landrace	Liaoning	China	8.06642
Fang et al 2017	K099	Glycine max	Landrace	Shanxi	China	7.67707
Fang et al 2017	K20-3	Glycine max	Landrace	Beijing	China	7.11303
Fang et al 2017	K9602-1	Glycine max	Landrace	Beijing	China	7.07601
Fang et al 2017	Kai_Feng_Qing_Dou	Glycine max	Landrace	Henan	China	7.4545
Fang et al 2017	Kuai_Qing_Pi	Glycine max	Landrace	Liaoning	China	8.082
Fang et al 2017	Lai_Wu_Ba_Yue_Zha	Glycine max	Landrace	Shandong	China	9.22927
Fang et al 2017	Lao_Shu_Pi	Glycine max	Landrace	Shaanxi	China	7.37924
Fang et al 2017	Le_Shan_Da_Huang_Ke	Glycine max	Landrace	Sichuan	China	8.11941
Fang et al 2017	Le_Shan_Zi_PIDou	Glycine max	Landrace	Sichuan	China	9.26862
Fang et al 2017	Lei_Lei_Dou	Glycine max	Landrace	Shanxi	China	9.24107
Fang et al 2017	Li_Cheng_Xiao_Li_Qing	Glycine max	Landrace	Shandong	China	9.12757
Fang et al 2017	Lin_Xian_Cao_Huang_Dou	Glycine max	Landrace	Henan	China	8.9336
Fang et al 2017	Liu_Shi_Ri_Jin_Huang_Da_Dou	Glycine max	Landrace	Shandong	China	9.08167
Fang et al 2017	Liu_Shi_Tian_Huan_Cang	Glycine max	Landrace	Liaoning	China	8.30054
Fang et al 2017	Liu_Yue_Bao	Glycine max	Landrace	Anhui	China	8.84398
Fang et al 2017	Liu_Yue_Hong	Glycine max	Landrace	Shandong	China	8.55188
Fang et al 2017	Long_quan_Da_Dou	Glycine max	Landrace	Heilongjiang	China	20.7591
Fang et al 2017	Lu_Tuan_Bai_Jian_Ke	Glycine max	Landrace	Anhui	China	5.98643
Fang et al 2017	Lyu_Cao_Dou	Glycine max	Landrace	Shandong	China	6.87419
Fang et al 2017	Lyu_Xin_Lao_Ya_Ling	Glycine max	Landrace	Shaanxi	China	6.23933
Fang et al 2017	Ma_Ma_Niu_Mao_Huang	Glycine max	Landrace	Shaanxi	China	7.9462
Fang et al 2017	Ma_Yi_Qi_Hei_Dou	Glycine max	Landrace	Beijing	China	10.0286
Fang et al 2017	Mao_Dou_Zi	Glycine max	Landrace	Hebei	China	7.54331
Fang et al 2017	Mao_Huang_Dou	Glycine max	Landrace	Shandong	China	7.35642
Fang et al 2017	Mao_Jia_Dou	Glycine max	Landrace	Liaoning	China	8.70905
Fang et al 2017	Meng_Cheng_Ba_Yue_Zha	Glycine max	Landrace	Anhui	China	7.75107
Fang et al 2017	Mi_Feng_Qiu	Glycine max	Landrace	Anhui	China	8.43005
Fang et al 2017	Mi_Yun_Hua_Lian_Hu	Glycine max	Landrace	Beijing	China	7.24868
Fang et al 2017	Mi_Yun_Hua_Yao	Glycine max	Landrace	Beijing	China	6.52487
Fang et al 2017	Mi_Yun_Lao_Ye_Lian	Glycine max	Landrace	Beijing	China	6.18289
Fang et al 2017	Mo_Shi	Glycine max	Landrace	Shandong	China	7.23822
Fang et al 2017	Nan_Guan_Xiao_PIQing	Glycine max	Landrace	Hebei	China	19.8579
Fang et al 2017	Ni_Ding_Hua_Mei_Dou	Glycine max	Landrace	Ningxia	China	17.1708
Fang et al 2017	Ni_Dou	Glycine max	Landrace	Hubei	China	18.0089
Fang et al 2017	Nian_Shi_Huang_Dou	Glycine max	Landrace	.	CHina	21.0144
Fang et al 2017	Ning_Xian_Yi_Wo_Feng	Glycine max	Landrace	Gansu	China	8.61059
Fang et al 2017	Ning_Yang_Jiao_Zi_Ye	Glycine max	Landrace	Shandong	China	6.39763
Fang et al 2017	Ning_Zhen_No.1	Glycine max	Landrace	Jiangsu	China	6.36411
Fang et al 2017	Niu_Jiao_Qi	Glycine max	Landrace	Shandong	China	6.18651
Fang et al 2017	Niu_Mao_Huang	Glycine max	Landrace	North	China	6.61214
Fang et al 2017	Niu_Mao_Huang_Hei_Dou	Glycine max	Landrace	Shanxi	China	6.7117
Fang et al 2017	Niu_Yan_Jing_Quan_Zi	Glycine max	Landrace	Shaanxi	China	8.56455
Fang et al 2017	Pa_Man_Qing	Glycine max	Landrace	Shandong	China	7.31428
Fang et al 2017	Pei_Xian_Ba_Yue_Zha	Glycine max	Landrace	Jiangsu	China	7.63818
Fang et al 2017	Pei_Xian_Da_Bai_Jiao	Glycine max	Landrace	Jiangsu	China	7.76322
Fang et al 2017	Pei_Xian_Hong_Mao_You	Glycine max	Landrace	Jiangsu	China	6.81464
Fang et al 2017	Pei_Xian_Hong_Mao_You_Jia	Glycine max	Landrace	Jiangsu	China	8.40226
Fang et al 2017	Pei_Xian_La_Yang_Huang	Glycine max	Landrace	Jiangsu	China	6.86653
Fang et al 2017	Pei_Xian_Si_Li_Cao	Glycine max	Landrace	Jiangsu	China	7.10351
Fang et al 2017	Pei_Xian_Xiao_You_Dou	Glycine max	Landrace	Jiangsu	China	15.1509
Fang et al 2017	Peng_Xi_Da_Liu_Yue_Huang	Glycine max	Landrace	Sichuan	China	7.25156
Fang et al 2017	PI253658B	Glycine max	Landrace	.	China	15.2668
Fang et al 2017	PI283327	Glycine max	Landrace	Taiwan	China	12.2822
Fang et al 2017	PI297543	Glycine max	Landrace	North	China	8.30771
Fang et al 2017	PI404182	Glycine max	Landrace	.	China	21.9016
Fang et al 2017	PI407716	Glycine max	Landrace	Jilin	China	45.1841
Fang et al 2017	PI417398	Glycine max	Landrace	.	China	19.4189
Fang et al 2017	PI437653	Glycine max	Landrace	.	China	21.7153
Fang et al 2017	PI437944	Glycine max	Landrace	Northeast	China	17.2089
Fang et al 2017	PI467343	Glycine max	Landrace	Jilin	China	25.6764
Fang et al 2017	PI548298	Glycine max	Landrace	.	China	28.6883
Fang et al 2017	PI548318	Glycine max	Landrace	Jilin	China	5.96107
Fang et al 2017	PI548348	Glycine max	Landrace	Northeast	China	42.3703
Fang et al 2017	PI548379	Glycine max	Landrace	Heilongjiang	China	54.8372
Fang et al 2017	PI548382	Glycine max	Landrace	Liaoning	China	26.1517
Fang et al 2017	PI548391	Glycine max	Landrace	Liaoning	China	36.1106
Fang et al 2017	PI548402	Glycine max	Landrace	Beijing	China	22.0174
Fang et al 2017	PI548406	Glycine max	Landrace	Jilin	China	19.2251
Fang et al 2017	PI548445	Glycine max	Landrace	Jiangsu	China	10.4668
Fang et al 2017	PI548485	Glycine max	Landrace	Jiangsu	China	8.12253
Fang et al 2017	PI548488	Glycine max	Landrace	Heilongjiang	China	25.2804
Fang et al 2017	PI567238	Glycine max	Landrace	Yunnan	China	9.36422
Fang et al 2017	PI567258	Glycine max	Landrace	Jiangxi	China	34.03
Fang et al 2017	PI567293	Glycine max	Landrace	Gansu	China	27.0309
Fang et al 2017	PI567298	Glycine max	Landrace	Gansu	China	22.9261
Fang et al 2017	PI567364	Glycine max	Landrace	Ningxia	China	26.7219
Fang et al 2017	PI567368	Glycine max	Landrace	Ningxia	China	6.85146
Fang et al 2017	PI567395	Glycine max	Landrace	Shaanxi	China	11.7527
Fang et al 2017	PI567481	Glycine max	Landrace	Hebei	China	7.57741
Fang et al 2017	PI567503	Glycine max	Landrace	Hebei	China	18.2201
Fang et al 2017	PI567525	Glycine max	Landrace	Shandong	China	22.1714
Fang et al 2017	PI567700	Glycine max	Landrace	Anhui	China	11.3245
Fang et al 2017	PI567720A	Glycine max	Landrace	Anhui	China	9.67841
Fang et al 2017	PI567730	Glycine max	Landrace	Anhui	China	7.17447
Fang et al 2017	PI587552	Glycine max	Landrace	Jiangsu	China	23.6671
Fang et al 2017	PI587666	Glycine max	Landrace	Anhui	China	30.2818
Fang et al 2017	PI587752	Glycine max	Landrace	Hubei	China	20.0111
Fang et al 2017	PI587848	Glycine max	Landrace	Hubei	China	18.5541
Fang et al 2017	PI588053A	Glycine max	Landrace	Guangdong	China	22.2861
Fang et al 2017	PI594451	Glycine max	Landrace	Sichuan	China	49.1545
Fang et al 2017	PI594579	Glycine max	Landrace	Hunan	China	33.5925
Fang et al 2017	PI594615	Glycine max	Landrace	Guizhou	China	43.8873
Fang et al 2017	PI594629	Glycine max	Landrace	Guizhou	China	21.1975
Fang et al 2017	PI594777	Glycine max	Landrace	Yunnan	China	31.6772
Fang et al 2017	PI594788	Glycine max	Landrace	Yunnan	China	23.0275
Fang et al 2017	PI602991	Glycine max	Landrace	Shandong	China	20.1868
Fang et al 2017	PI603318	Glycine max	Landrace	Heilongjiang	China	26.056
Fang et al 2017	PI603336	Glycine max	Landrace	Heilongjiang	China	64.5444
Fang et al 2017	PI603357	Glycine max	Landrace	Jilin	China	20.0345
Fang et al 2017	PI603384	Glycine max	Landrace	Jilin	China	51.5491
Fang et al 2017	PI603420	Glycine max	Landrace	Innermongolia	China	15.1725
Fang et al 2017	PI603424A	Glycine max	Landrace	.	China	44.5183
Fang et al 2017	PI603516	Glycine max	Landrace	Shaanxi	China	37.1202
Fang et al 2017	PI603596	Glycine max	Landrace	Fujian	China	16.4167
Fang et al 2017	PI603675	Glycine max	Landrace	Jiangsu	China	23.1195
Fang et al 2017	PI603756	Glycine max	Landrace	Zhejiang	China	18.414
Fang et al 2017	PI80822	Glycine max	Landrace	Liaoning	China	21.1713
Fang et al 2017	PI88479	Glycine max	Landrace	Jilin	China	23.4041
Fang et al 2017	Ping_Ding_Hei	Glycine max	Landrace	Shandong	China	7.94927
Fang et al 2017	Ping_Ding_Huang_Dou	Glycine max	Landrace	Shandong	China	6.82309
Fang et al 2017	Ping_Yi_Liu_Yue_Xian	Glycine max	Landrace	Shandong	China	6.67608
Fang et al 2017	PIXian_Da_Zi_Huo_Cao	Glycine max	Landrace	Jiangsu	China	18.3925
Fang et al 2017	PIXian_Nian_Zhuang_Liu_Yue_Xian	Glycine max	Landrace	Jiangsu	China	21.9456
Fang et al 2017	Pu_Dong_Da_Huang_Dou	Glycine max	Landrace	Shanghai	China	7.49039
Fang et al 2017	Qi_Dong_Guan_Qing_Dou_Jia	Glycine max	Landrace	Jiangsu	China	11.0782
Fang et al 2017	Qi_Si_Mi	Glycine max	Landrace	Shandong	China	7.8728
Fang et al 2017	Qi_Yue_Zha	Glycine max	Landrace	Shandong	China	7.38865
Fang et al 2017	Qian_An_Yi_Li_Chuan	Glycine max	Landrace	Shaanxi	China	7.98661
Fang et al 2017	Qiao_Ning_Ping_Ding_Huang	Glycine max	Landrace	Jiangsu	China	7.41594
Fang et al 2017	Qin_Yang_Bai_Dou	Glycine max	Landrace	Henan	China	10.0145
Fang et al 2017	Qing_An_Hei_Dou	Glycine max	Landrace	Heilongjiang	China	7.30663
Fang et al 2017	Qing_Dou	Glycine max	Landrace	Liaoning	China	18.342
Fang et al 2017	Qing_Ke_Yuan_Dou	Glycine max	Landrace	Shanxi	China	6.66481
Fang et al 2017	Qing_Mo_Shi_Dou	Glycine max	Landrace	Liaoning	China	8.47973
Fang et al 2017	Qing_No.6	Glycine max	Landrace	Shandong	China	7.09245
Fang et al 2017	Qing_PIPing_Ding_Xiang	Glycine max	Landrace	Liaoning	China	6.75666
Fang et al 2017	Rao_Shan_Gun	Glycine max	Landrace	Hebei	China	7.72699
Fang et al 2017	Rui_Jin_Qing_PIDou	Glycine max	Landrace	Jiangxi	China	6.7602
Fang et al 2017	Sha_Xian_Qin_Dou	Glycine max	Landrace	Fujian	China	19.0763
Fang et al 2017	Sha_Xian_Wu_Dou	Glycine max	Landrace	Fujian	China	18.8959
Fang et al 2017	Sha_Xin_Dou	Glycine max	Landrace	Jiangxi	China	20.2816
Fang et al 2017	Shan_Xi_Huang_Sha_Dou	Glycine max	Landrace	Shaanxi	China	7.80385
Fang et al 2017	Shan_Xi_Ping_Ding_Huang	Glycine max	Landrace	Shanxi	China	6.15386
Fang et al 2017	Shang_Hai_Chi_Sha_Huang_Dou	Glycine max	Landrace	Shanghai	China	6.29103
Fang et al 2017	Shang_Qiu_Jiu_Yue_Qing	Glycine max	Landrace	Henan	China	8.29967
Fang et al 2017	Shang_Qiu_Ping_Ding_Shi	Glycine max	Landrace	Henan	China	7.03949
Fang et al 2017	Shi_Da_Dou_No.1	Glycine max	Landrace	Xinjiang	China	9.04451
Fang et al 2017	Shi_Da_Dou_No.2	Glycine max	Landrace	Xinjiang	China	8.50175
Fang et al 2017	Shi_Mian_Da_Dou_Zi	Glycine max	Landrace	Sichuan	China	7.49537
Fang et al 2017	Shu_Yang_Da_Qing_Dou_Jia	Glycine max	Landrace	Jiangsu	China	8.35581
Fang et al 2017	Shu_Yang_Gua_Shu	Glycine max	Landrace	Jiangsu	China	6.54255
Fang et al 2017	Shui_Li_Zhan	Glycine max	Landrace	Shandong	China	6.33509
Fang et al 2017	Shui_Niu_Pi	Glycine max	Landrace	Anhui	China	6.72474
Fang et al 2017	Shui_PIQing_Dou	Glycine max	Landrace	Shandong	China	7.83108
Fang et al 2017	Shun_Yi_Hei_Dou	Glycine max	Landrace	Beijing	China	6.45598
Fang et al 2017	Si_Jiao_Qi	Glycine max	Landrace	Shandong	China	6.39467
Fang et al 2017	Si_Jiao_Qi_Huang_Dou	Glycine max	Landrace	Hebei	China	7.61165
Fang et al 2017	Si_Li_Hei_Dou	Glycine max	Landrace	Shandong	China	8.65665
Fang et al 2017	Si_Li_Jia	Glycine max	Landrace	Anhui	China	7.53918
Fang et al 2017	Si_Li_Jia_Da_Dou	Glycine max	Landrace	Heilongjiang	China	8.0646
Fang et al 2017	Si_Li_Yuan	Glycine max	Landrace	Shandong	China	6.98984
Fang et al 2017	Song_Jiang_Deng_Xi_Feng_Jia	Glycine max	Landrace	Shanghai	China	8.9474
Fang et al 2017	Su_Dou_No.1	Glycine max	Landrace	Jiangsu	China	8.80556
Fang et al 2017	Su_Xian_Ping_Ding_Wu	Glycine max	Landrace	Anhui	China	7.1594
Fang et al 2017	Su_Xian_Tian_E_Dan	Glycine max	Landrace	Anhui	China	9.29214
Fang et al 2017	Su_Zhou_Wu_Yue_Mao_Jia	Glycine max	Landrace	Jiangsu	China	6.75719
Fang et al 2017	Sui_Ning_Da_Qing_Dou_Jia	Glycine max	Landrace	Jiangsu	China	8.75442
Fang et al 2017	Tai_An_Ba_Yue_Zha	Glycine max	Landrace	Shandong	China	8.2495
Fang et al 2017	Tai_Gu_Zao	Glycine max	Landrace	Shanxi	China	7.24283
Fang et al 2017	Tai_Xin_Niu_Mao_Huang_Yi	Glycine max	Landrace	Jiangsu	China	17.1497
Fang et al 2017	Tai_Xing_Hei_Dou	Glycine max	Landrace	Jiangsu	China	7.50078
Fang et al 2017	Tai_Zhou_Bai_Hua_Wu_Jia_No.2	Glycine max	Landrace	Jiangsu	China	6.99633
Fang et al 2017	Tan_Er_Bai	Glycine max	Landrace	Gansu	China	7.68235
Fang et al 2017	Te_Da_Dou_No.1	Glycine max	Landrace	South	China	7.7559
Fang et al 2017	Te_Da_Li	Glycine max	Landrace	Shaanxi	China	7.86335
Fang et al 2017	Teng_Xian_Da_Wu_Ye	Glycine max	Landrace	Shandong	China	7.6234
Fang et al 2017	Tian_E_Dan	Glycine max	Landrace	Shandong	China	19.2385
Fang et al 2017	Tian_E_Dan_2	Glycine max	Landrace	South	China	7.60068
Fang et al 2017	Tie_Jia_Hei	Glycine max	Landrace	Hebei	China	6.35326
Fang et al 2017	Tie_Jiao_Huang	Glycine max	Landrace	Anhui	China	8.20734
Fang et al 2017	Tong_an_Zi_Hong_Dou	Glycine max	Landrace	Fujian	China	18.3524
Fang et al 2017	Tong_Shan_Hu_Shan_Da_Si_Li	Glycine max	Landrace	Jiangsu	China	7.23943
Fang et al 2017	Tong_Shan_Tian_E_Dan	Glycine max	Landrace	Jiangsu	China	8.58856
Fang et al 2017	Tong_Xian_Hei_Shui_Dou	Glycine max	Landrace	Beijing	China	9.30975
Fang et al 2017	Tong_Ye_Ping	Glycine max	Landrace	North	China	8.04519
Fang et al 2017	Tu_Er_Yan	Glycine max	Landrace	Hebei	China	9.00566
Fang et al 2017	Tu_Hei_Dou	Glycine max	Landrace	Shanxi	China	6.66651
Fang et al 2017	Wan_Dou_Zao	Glycine max	Landrace	Shaanxi	China	7.65609
Fang et al 2017	Wang_Zhong_Wang	Glycine max	Landrace	Xinjiang	China	6.56816
Fang et al 2017	WD001	Glycine max	Landrace	North	China	7.88246
Fang et al 2017	Wei_Xian_Gu_Li_Hun_Qing_Dou	Glycine max	Landrace	Shandong	China	7.33469
Fang et al 2017	Wu_Chang_Liu_Yue_Bao	Glycine max	Landrace	Hubei	China	6.3646
Fang et al 2017	Wu_Gong_Yi_Wo_Feng	Glycine max	Landrace	Shaanxi	China	8.62035
Fang et al 2017	Wu_Jin_Ben_Niu_Qing_Dou	Glycine max	Landrace	Jiangsu	China	7.47666
Fang et al 2017	Wu_Ming	Glycine max	Landrace	Anhui	China	6.53797
Fang et al 2017	Xi_Chuan_Ji_Wo_Huang	Glycine max	Landrace	Henan	China	5.9595
Fang et al 2017	Xia_Hei_Dou	Glycine max	Landrace	Shanxi	China	18.353
Fang et al 2017	Xia_Men_Teng_Zai_Dou	Glycine max	Landrace	Fujian	China	17.8195
Fang et al 2017	Xiang_Dou_No.4	Glycine max	Landrace	Hunan	China	36.437
Fang et al 2017	Xiao_Bai_Dou	Glycine max	Landrace	Shanxi	China	30.406
Fang et al 2017	Xiao_Bai_Qi	Glycine max	Landrace	Innermongolia	China	16.8223
Fang et al 2017	Xiao_Bian_Yuan_Dou	Glycine max	Landrace	Liaoning	China	8.3626
Fang et al 2017	Xiao_Hei_Dou	Glycine max	Landrace	Sichuan	China	6.87898
Fang et al 2017	Xiao_Hua_Dou	Glycine max	Landrace	Anhui	China	7.74942
Fang et al 2017	Xiao_Huang_Dou	Glycine max	Landrace	Guizhou	China	20.3417
Fang et al 2017	Xiao_Huang_Dou_2	Glycine max	Landrace	North	China	8.49364
Fang et al 2017	Xiao_Jin_Huang	Glycine max	Landrace	Liaoning	China	7.28293
Fang et al 2017	Xiao_Jin_Yuan	Glycine max	Landrace	Hebei	China	6.94772
Fang et al 2017	Xiao_Lao_Shu_Yan_Hei_Dou	Glycine max	Landrace	Shandong	China	8.70986
Fang et al 2017	Xiao_Li_Hei	Glycine max	Landrace	Shandong	China	8.97392
Fang et al 2017	Xiao_Li_Huang	Glycine max	Landrace	Hebei	China	6.37716
Fang et al 2017	Xiao_Mi_Dou	Glycine max	Landrace	Shandong	China	13.6472
Fang et al 2017	Xiao_Qing_Dou	Glycine max	Landrace	South	China	7.82241
Fang et al 2017	Xin_Da_Dou_No.1	Glycine max	Landrace	Xinjiang	China	7.46154
Fang et al 2017	Xin_Jiang_Zao_Shu_Pin_Zhong	Glycine max	Landrace	Xinjiang	China	7.29703
Fang et al 2017	Xin_Xian_Xiao_Huang_Dou	Glycine max	Landrace	Shanxi	China	22.7865
Fang et al 2017	Xin_Yang_Yang_Yan_Dou	Glycine max	Landrace	Henan	China	7.90766
Fang et al 2017	Xing_Hua_Ma_Shi_Zi_Ding	Glycine max	Landrace	Jiangsu	China	9.01953
Fang et al 2017	Xiong_Yue_Xiao_Li_Huang	Glycine max	Landrace	Liaoning	China	8.3025
Fang et al 2017	Xu_Zhou_Xiao_You_Dou	Glycine max	Landrace	Jiangsu	China	7.4365
Fang et al 2017	Yan_An_Dou	Glycine max	Landrace	Shaanxi	China	8.61287
Fang et al 2017	Yan_Cheng_Qi_Si_Ni_Dou	Glycine max	Landrace	Henan	China	9.54929
Fang et al 2017	Yan_Huang_No.1	Glycine max	Landrace	Shandong	China	8.259
Fang et al 2017	Yan_Tian_Qing_PIDou	Glycine max	Landrace	Jiangxi	China	8.56649
Fang et al 2017	Yang_Da_Li	Glycine max	Landrace	Liaoning	China	8.327
Fang et al 2017	Yang_Tian_Xiao_Huang_Dou	Glycine max	Landrace	Hebei	China	8.24129
Fang et al 2017	Yang_Yan	Glycine max	Landrace	Shandong	China	7.80229
Fang et al 2017	Ye_Xian_Hong_Gun_Dou	Glycine max	Landrace	Henan	China	7.4637
Fang et al 2017	Yi_Du_Ping_Ding_Huang	Glycine max	Landrace	Shandong	China	6.55187
Fang et al 2017	Yi_Li_Hei_Dou	Glycine max	Landrace	South	China	8.04147
Fang et al 2017	Yi_Zheng_Da_Li_Huang_Dou	Glycine max	Landrace	Jiangsu	China	21.2781
Fang et al 2017	Yong_Cheng_Xiao_Jian_Ke	Glycine max	Landrace	Henan	China	7.77313
Fang et al 2017	Yong_Cheng_Yang_Yan_Dou	Glycine max	Landrace	Henan	China	7.16743
Fang et al 2017	You_PIZhi_Hei_Dou	Glycine max	Landrace	Shanxi	China	22.0694
Fang et al 2017	Yu_Jiang_Wu_Yue_Niu_Mao_Huang	Glycine max	Landrace	Jiangsu	China	16.4481
Fang et al 2017	Yu_Shi_Dou	Glycine max	Landrace	Liaoning	China	16.1341
Fang et al 2017	Yu_Xian_Xiao_Zi_Cao_Hei_Dou	Glycine max	Landrace	Henan	China	9.66258
Fang et al 2017	Zao_Zhuang_Leng_Da_Dou	Glycine max	Landrace	Shandong	China	8.2903
Fang et al 2017	Zhang_Qiu_Jia_Huang_Dou	Glycine max	Landrace	Shandong	China	8.21528
Fang et al 2017	Zhen_Yuan_Ba_Yue_Zha	Glycine max	Landrace	Gansu	China	9.5077
Fang et al 2017	Zheng_Ning_Lyu_Huang_Dou	Glycine max	Landrace	Gansu	China	7.51365
Fang et al 2017	Zhong_Sheng_Da_Jia_Zhi_Dou	Glycine max	Landrace	Beijing	China	7.14623
Fang et al 2017	Zhu_Twinning_2	Glycine max	Landrace	Beijing	China	13.6759
Fang et al 2017	Zhu_Twinning_3_nonshattering	Glycine max	Landrace	Beijing	China	12.7787
Fang et al 2017	Zhu_Ye_Qing	Glycine max	Landrace	Shaanxi	China	6.84008
Fang et al 2017	Zi_Gong_Qing_PIDou	Glycine max	Landrace	Sichuan	China	8.43107
Fang et al 2017	Zi_Jie_Dou	Glycine max	Landrace	Shanxi	China	7.3649
Fang et al 2017	Zong_Mao_Bian_Jing	Glycine max	Landrace	Liaoning	China	8.10484
Fang et al 2017	Zou_Ping_Hei_Ma_Hu_Yan	Glycine max	Landrace	Shandong	China	8.47349
Valliyodan et al 2016	PI079691-4	Glycine max	Landrace	.	China	22.9604
Valliyodan et al 2016	PI088788	Glycine max	Landrace	.	China	19.7588
Valliyodan et al 2016	PI089772	Glycine max	Landrace	.	China	29.6013
Valliyodan et al 2016	PI090763	Glycine max	Landrace	.	China	26.1994
Valliyodan et al 2016	PI404166	Glycine max	Landrace	.	China	29.9742
Valliyodan et al 2016	PI404198B	Glycine max	Landrace	.	China	26.8276
Valliyodan et al 2016	PI407729	Glycine max	Landrace	.	China	22.9905
Valliyodan et al 2016	PI437654	Glycine max	Landrace	.	China	55.5431
Valliyodan et al 2016	PI437655	Glycine max	Landrace	.	China	24.7504
Valliyodan et al 2016	PI437679	Glycine max	Landrace	.	China	11.3814
Valliyodan et al 2016	PI437690	Glycine max	Landrace	.	China	26.1073
Valliyodan et al 2016	PI437725	Glycine max	Landrace	.	China	22.9919
Valliyodan et al 2016	PI467312	Glycine max	Landrace	.	China	22.9709
Valliyodan et al 2016	PI468915	Glycine max	Landrace	.	China	22.3979
Valliyodan et al 2016	PI495017C	Glycine max	Landrace	.	China	28.2369
Valliyodan et al 2016	PI548316	Glycine max	Landrace	.	China	31.7119
Valliyodan et al 2016	PI548317	Glycine max	Landrace	.	China	26.0776
Valliyodan et al 2016	PI548402a	Glycine max	Landrace	.	China	29.5758
Valliyodan et al 2016	PI548415	Glycine max	Landrace	.	China	22.8359
Valliyodan et al 2016	PI549031	Glycine max	Landrace	.	China	23.3039
Valliyodan et al 2016	PI567230	Glycine max	Landrace	.	China	23.4912
Valliyodan et al 2016	PI567305	Glycine max	Landrace	.	China	24.1084
Valliyodan et al 2016	PI567336B	Glycine max	Landrace	.	China	23.4204
Valliyodan et al 2016	PI567343	Glycine max	Landrace	.	China	23.4498
Valliyodan et al 2016	PI567354	Glycine max	Landrace	.	China	23.509
Valliyodan et al 2016	PI567357	Glycine max	Landrace	.	China	23.4205
Valliyodan et al 2016	PI567383	Glycine max	Landrace	.	China	23.4319
Valliyodan et al 2016	PI567387	Glycine max	Landrace	.	China	22.8613
Valliyodan et al 2016	PI567516C	Glycine max	Landrace	.	China	24.3255
Valliyodan et al 2016	PI603497	Glycine max	Landrace	.	China	22.977
Fang et al 2017	PI323576	Glycine max	Landrace	Uttar Pradesh	India	18.3181
Fang et al 2017	PI567071A	Glycine max	Landrace	.	Indonesia	13.3723
Fang et al 2017	PI548417	Glycine max	Landrace	Naples	Italy	22.5165
Fang et al 2017	Bei_Hai_Dao_Da_Dou	Glycine max	Landrace	Hokkaido	Japan	8.01255
Fang et al 2017	PI243541	Glycine max	Landrace	Hokkaido	Japan	19.8637
Fang et al 2017	PI317334A	Glycine max	Landrace	.	Japan	16.9051
Fang et al 2017	PI317336	Glycine max	Landrace	Hokkaido	Japan	20.1995
Fang et al 2017	PI416890	Glycine max	Landrace	.	Japan	28.4042
Fang et al 2017	PI416971	Glycine max	Landrace	Kinki	Japan	19.4476
Fang et al 2017	PI423954	Glycine max	Landrace	Kumamoto	Japan	17.6341
Fang et al 2017	PI423967	Glycine max	Landrace	Kumamoto	Japan	7.35984
Fang et al 2017	PI507355	Glycine max	Landrace	Hokkaido	Japan	26.1233
Fang et al 2017	PI548342	Glycine max	Landrace	Honshu	Japan	27.7306
Fang et al 2017	PI594301	Glycine max	Landrace	.	Japan	31.5203
Fang et al 2017	PI59845	Glycine max	Landrace	Akita	Japan	5.85076
Fang et al 2017	PI80837	Glycine max	Landrace	Akita	Japan	38.2766
Fang et al 2017	PI81775	Glycine max	Landrace	Akita	Japan	6.80057
Fang et al 2017	PI84987	Glycine max	Landrace	Saitama	Japan	25.5196
Fang et al 2017	PI84987A	Glycine max	Landrace	Saitama	Japan	13.8483
Fang et al 2017	PI86024	Glycine max	Landrace	Hokkaido	Japan	18.4862
Fang et al 2017	Ri_Ben_Hei_Qi	Glycine max	Landrace	.	Japan	8.4664
Torkamaneh et al 2017	PI417091	Glycine max	Landrace	.	Japan	25.141
Valliyodan et al 2016	PI086006	Glycine max	Landrace	.	Japan	22.9425
Valliyodan et al 2016	PI087631-1	Glycine max	Landrace	.	Japan	22.8309
Valliyodan et al 2016	PI209332	Glycine max	Landrace	.	Japan	28.3027
Valliyodan et al 2016	PI507354	Glycine max	Landrace	.	Japan	24.1485
Fang et al 2017	PI548456	Glycine max	Landrace	Pyongyang	North Korea	18.4786
Fang et al 2017	PI89138	Glycine max	Landrace	Hamgyong Puk	North Korea	22.9141
Valliyodan et al 2016	PI548349	Glycine max	Landrace	.	North Korea	22.8942
Valliyodan et al 2016	PI612611	Glycine max	Landrace	.	North Korea	27.3145
Fang et al 2017	Kuban_BenDi_No.1	Glycine max	Landrace	.	Russia	6.86034
Fang et al 2017	PI437321	Glycine max	Landrace	Primorye	Russia	17.2239
Fang et al 2017	PI157421	Glycine max	Landrace	.	South Korea	16.5027
Fang et al 2017	PI196166	Glycine max	Landrace	.	South Korea	19.4394
Fang et al 2017	PI339734	Glycine max	Landrace	Kangwon	South Korea	31.7625
Fang et al 2017	PI398296	Glycine max	Landrace	Kyonggi	South Korea	26.0831
Fang et al 2017	PI399043	Glycine max	Landrace	Cheju	South Korea	46.4434
Fang et al 2017	PI407801	Glycine max	Landrace	Kyonggi	South Korea	19.7859
Fang et al 2017	PI407849	Glycine max	Landrace	ChollaPuk	South Korea	21.5635
Fang et al 2017	PI423766	Glycine max	Landrace	Kangwon	South Korea	8.56015
Fang et al 2017	PI424391	Glycine max	Landrace	ChollaPuk	South Korea	22.7276
Fang et al 2017	PI83945-3	Glycine max	Landrace	Kyonggi	South Korea	17.9711
Fang et al 2017	PI84631	Glycine max	Landrace	Kyonggi	South Korea	19.725
Valliyodan et al 2016	PI424078	Glycine max	Landrace	.	South Korea	23.0489
Valliyodan et al 2016	PI424298	Glycine max	Landrace	.	South Korea	29.2535
Valliyodan et al 2016	PI424608A	Glycine max	Landrace	.	South Korea	22.6701
Fang et al 2017	Xepcoh_BenDi_No.1	Glycine max	Landrace	Xepcoh	Ukraine	6.28687
Fang et al 2017	DcJSey4500	Glycine max	Landrace	.	United States	9.04834
Fang et al 2017	Huang_Sha_Dou_America	Glycine max	Landrace	.	United States	8.38374
Fang et al 2017	L60-246	Glycine max	Landrace	Illinois	United States	10.3818
Fang et al 2017	Mamotan_F-8_A	Glycine max	Landrace	Mississippi	United States	6.17104
Fang et al 2017	PI438498	Glycine max	Landrace	.	United States	16.9605
Fang et al 2017	PI525453_Conrad	Glycine max	Landrace	Iowa	United States	8.25363
Fang et al 2017	PI547539_L71-1403	Glycine max	Landrace	Illinois	United States	9.32327
Fang et al 2017	PI547549_L72-1832	Glycine max	Landrace	Illinois	United States	10.6512
Fang et al 2017	PI547553_L72-1893	Glycine max	Landrace	Illinois	United States	7.51656
Fang et al 2017	PI547612_L74-826	Glycine max	Landrace	Illinois	United States	10.8507
Fang et al 2017	PI547732_L67-234	Glycine max	Landrace	Illinois	United States	7.69323
Fang et al 2017	PI547745_L70-4136	Glycine max	Landrace	Illinois	United States	8.29329
Fang et al 2017	PI547782_L73D-2743	Glycine max	Landrace	Illinois	United States	7.37679
Fang et al 2017	PI547786_L79-842	Glycine max	Landrace	Illinois	United States	8.65722
Fang et al 2017	PI556511_A3127	Glycine max	Landrace	.	United States	8.04342
Fang et al 2017	PI567189A	Glycine max	Landrace	.	Vietnam	22.2573
Fang et al 2017	PI578457A	Glycine max	Landrace	.	Vietnam	11.5708
Valliyodan et al 2016	PI483463	Glycine soja	Wild	.	China	22.8173
Zhou et al 2015	PI393551	Glycine soja	Wild	Taiwan	China	10.22
Zhou et al 2015	PI407288	Glycine soja	Wild	Jilin	China	12.43
Zhou et al 2015	PI407301	Glycine soja	Wild	Zhejiang	China	10.75
Zhou et al 2015	PI447004	Glycine soja	Wild	Jilin	China	11.92
Zhou et al 2015	PI458535	Glycine soja	Wild	Heilongjiang	China	11.53
Zhou et al 2015	PI458536	Glycine soja	Wild	Heilongjiang	China	13.42
Zhou et al 2015	PI458538	Glycine soja	Wild	Heilongjiang	China	16.91
Zhou et al 2015	PI464929B	Glycine soja	Wild	Liaoning	China	12.24
Zhou et al 2015	PI479752	Glycine soja	Wild	Jilin	China	10.78
Zhou et al 2015	PI479769	Glycine soja	Wild	Heilongjiang	China	13.5
Zhou et al 2015	PI483460B	Glycine soja	Wild	Liaoning	China	3.67
Zhou et al 2015	PI483465	Glycine soja	Wild	Shaanxi	China	16.31
Zhou et al 2015	PI522182B	Glycine soja	Wild	Heilongjiang	China	12.7
Zhou et al 2015	PI549046	Glycine soja	Wild	Shaanxi	China	18.61
Zhou et al 2015	PI597461A	Glycine soja	Wild	Shandong	China	16.12
Zhou et al 2015	PI597461C	Glycine soja	Wild	Shandong	China	13.92
Zhou et al 2015	ZJ-Y108	Glycine soja	Wild	Zhejiang	China	10.75
Zhou et al 2015	ZJ-Y155	Glycine soja	Wild	Zhejiang	China	11.91
Zhou et al 2015	ZJ-Y191	Glycine soja	Wild	Zhejiang	China	13.35
Zhou et al 2015	ZJ-Y200	Glycine soja	Wild	Zhejiang	China	10.73
Zhou et al 2015	ZJ-Y217	Glycine soja	Wild	Zhejiang	China	13.92
Zhou et al 2015	ZJ-Y282	Glycine soja	Wild	Zhejiang	China	11.91
Zhou et al 2015	ZJ-Y314	Glycine soja	Wild	Zhejiang	China	8.32
Zhou et al 2015	ZJ-YJ086	Glycine soja	Wild	Zhejiang	China	9.19
Zhou et al 2015	ZJ-ZY020	Glycine soja	Wild	Zhejiang	China	9.87
Valliyodan et al 2016	PI378702	Glycine soja	Wild	.	Japan	23.0201
Zhou et al 2015	PI366120	Glycine soja	Wild	Akita	Japan	20.74
Zhou et al 2015	PI366123	Glycine soja	Wild	Iwate	Japan	13.05
Zhou et al 2015	PI378692	Glycine soja	Wild	Iwate	Japan	11.88
Zhou et al 2015	PI407027	Glycine soja	Wild	Akita	Japan	15.44
Zhou et al 2015	PI407131	Glycine soja	Wild	Kumamoto	Japan	17.88
Zhou et al 2015	PI407285	Glycine soja	Wild	Kanagawa	Japan	11.5
Zhou et al 2015	PI507662	Glycine soja	Wild	Kagoshima	Japan	4.84
Zhou et al 2015	PI339871A	Glycine soja	Wild	Cheju	Korea	3.46
Zhou et al 2015	PI407170	Glycine soja	Wild	Kyonggi	Korea	18.75
Zhou et al 2015	PI407197	Glycine soja	Wild	Kangwon	Korea	11.37
Zhou et al 2015	PI407246	Glycine soja	Wild	KyongsangPuk	Korea	12.27
Zhou et al 2015	PI504286	Glycine soja	Wild	ChungchongPuk	Korea	12.55
Zhou et al 2015	PI562559	Glycine soja	Wild	ChollaPuk	Korea	12.36
Zhou et al 2015	PI562565	Glycine soja	Wild	ChollaPuk	Korea	13.81
Zhou et al 2015	PI326582A	Glycine soja	Wild	Primorye	Russian Federation	14.9
Zhou et al 2015	PI423991	Glycine soja	Wild	Amur	Russian Federation	15.92
Zhou et al 2015	PI522216	Glycine soja	Wild	Primorye	Russian Federation	12.03
Zhou et al 2015	PI522226	Glycine soja	Wild	Primorye	Russian Federation	10.85
Zhou et al 2015	PI578341	Glycine soja	Wild	Khabarovsk	Russian Federation	13.13
Valliyodan et al 2016	PI407162	Glycine soja	Wild	.	South Korea	22.9543
Valliyodan et al 2016	PI407184	Glycine soja	Wild	.	South Korea	22.9993
Valliyodan et al 2016	PI424079	Glycine soja	Wild	.	South Korea	22.9806
Valliyodan et al 2016	PI424088	Glycine soja	Wild	.	South Korea	23.3904
Zhou et al 2015	PI547831	Glycine soja	Wild	Illinois	United States	14.11
